# Supplementary material for: How DNA Barcodes Complement Taxonomy and Explore Species Diversity: The Case Study of a Poorly Understood Marine Fauna
Source: PubMed Central journal article supplement (PMC3116896; doi:10.1371/journal.pone.0021326), 2011-06-16
Supplement: pone.0021326.s001.pdf [file pone.0021326.s001.pdf]

| Classification | Collection information |                        |      |                           | Species                  |                                   |                                                | GenBank accession number | BOLD specimen number |
|----------------|------------------------|------------------------|------|---------------------------|--------------------------|-----------------------------------|------------------------------------------------|--------------------------|----------------------|
|                | Voucher number         | Locality               | Year | Collector                 | MOTU <sup>§</sup> number | Defined a priori                  | Final assignment                               |                          |                      |
| Callistinae    |                        |                        |      |                           |                          |                                   |                                                |                          |                      |
|                | ZB080301               | Beihai, Guangxi (BH)   | 2008 | Qi Li & Xiaodong Zheng    | 9                        | <i>Costacallista erycina</i>      | <i>Costacallista erycina</i>                   | HQ703031                 | BCC001-10            |
|                | ZB080302               | Beihai, Guangxi (BH)   | 2008 | Qi Li & Xiaodong Zheng    | 9                        | <i>Costacallista eryina</i>       | <i>Costacallista erycina</i>                   | HQ703032                 | BCC002-10            |
|                | ZB080303               | Beihai, Guangxi (BH)   | 2008 | Qi Li & Xiaodong Zheng    | 9                        | <i>Costacallista eryina</i>       | <i>Costacallista erycina</i>                   | HQ703033                 | BCC003-10            |
|                | ZB100401               | Beihai, Guangxi (BH)   | 2010 | Lingfeng Kong & Jun Chen  | 9                        | <i>Costacallista eryina</i>       | <i>Costacallista erycina</i>                   | HQ703034                 | BCC004-10            |
|                | ZP100101               | Pingtang, Fujian (PT)  | 2010 | Qiaozhen Ke               | 5                        | <i>Callista chinensis</i>         | <i>Callista chinensis</i>                      | HQ703035                 | BCC005-10            |
|                | ZP100102               | Pingtang, Fujian (PT)  | 2010 | Qiaozhen Ke               | 5                        | <i>Callista chinensis</i>         | <i>Callista chinensis</i>                      | HQ703036                 | BCC006-10            |
|                | DQ080401               | Qingdao, Shandong (QD) | 2008 | Jingbo Wang & Yanwei Feng | 15                       | <i>Ezocallista brevisiphonata</i> | <i>Ezocallista brevisiphonata</i> <sup>#</sup> | HQ703037                 | BCC007-10            |
|                | DQ080402               | Qingdao, Shandong (QD) | 2008 | Jingbo Wang & Yanwei Feng | 15                       | <i>Ezocallista brevisiphonata</i> | <i>Ezocallista brevisiphonata</i> <sup>#</sup> | HQ703038                 | BCC008-10            |
|                | DQ080403               | Qingdao, Shandong (QD) | 2008 | Jingbo Wang & Yanwei Feng | 15                       | <i>Ezocallista brevisiphonata</i> | <i>Ezocallista brevisiphonata</i> <sup>#</sup> | HQ703039                 | BCC009-10            |
|                | DQ080404               | Qingdao, Shandong (QD) | 2008 | Jingbo Wang & Yanwei Feng | 15                       | <i>Ezocallista brevisiphonata</i> | <i>Ezocallista brevisiphonata</i> <sup>#</sup> | HQ703040                 | BCC010-10            |
|                | ZP060701               | Panjin, Liaoning (PJ)  | 2006 | Shikai Liu                | 30                       | <i>Saxidomus purpurata</i>        | <i>Saxidomus purpurata</i>                     | HQ703041                 | BCC011-10            |
|                | ZP060702               | Panjin, Liaoning (PJ)  | 2006 | Shikai Liu                | 30                       | <i>Saxidomus purpurata</i>        | <i>Saxidomus purpurata</i>                     | HQ703042                 | BCC012-10            |
|                | ZP060703               | Panjin, Liaoning (PJ)  | 2006 | Shikai Liu                | 30                       | <i>Saxidomus purpurata</i>        | <i>Saxidomus purpurata</i>                     | HQ703043                 | BCC013-10            |
|                | ZP060704               | Panjin, Liaoning (PJ)  | 2006 | Shikai Liu                | 30                       | <i>Saxidomus purpurata</i>        | <i>Saxidomus purpurata</i>                     | HQ703044                 | BCC014-10            |
|                | SD100201*              | Dalian, Liaoning (DL)  | 2010 | Hongtao Nie               | 30                       | <i>Saxidomus</i> sp.              | <i>Saxidomus purpurata</i>                     | HQ703045                 | BCC015-10            |
|                | SD100202*              | Dalian, Liaoning (DL)  | 2010 | Hongtao Nie               | 30                       | <i>Saxidomus</i> sp.              | <i>Saxidomus purpurata</i>                     | HQ703046                 | BCC016-10            |

|           |                        |      |                          |     |                                |                                  |          |           |  |
|-----------|------------------------|------|--------------------------|-----|--------------------------------|----------------------------------|----------|-----------|--|
| SD100203* | Dalian, Liaoning (DL)  | 2010 | Hongtao Nie              | 30  | <i>Saxidomus</i> sp.           | <i>Saxidomus purpurata</i>       | HQ703047 | BCC017-10 |  |
| Chioninae |                        |      |                          |     |                                |                                  |          |           |  |
| LW061201* | Wenchang, Hainan (WC)  | 2006 | Rongxiang Gao            | 1   | <i>Anomalodiscus squamosus</i> | <i>Anomalodiscus squamosus</i>   | HQ703048 | BCC018-10 |  |
| LW061202  | Wenchang, Hainan (WC)  | 2006 | Rongxiang Gao            | 1   | <i>Anomalodiscus squamosus</i> | <i>Anomalodiscus squamosus</i>   | HQ703049 | BCC019-10 |  |
| LL061201  | Lingao, Hainan (LG)    | 2006 | Rongxiang Gao            | 1   | <i>Anomalodiscus squamosus</i> | <i>Anomalodiscus squamosus</i>   | HQ703050 | BCC020-10 |  |
| LS080201  | Sanya, Hainan (SY)     | 2008 | Qi Li & Xiaodong Zheng   | 1   | <i>Anomalodiscus squamosus</i> | <i>Anomalodiscus squamosus</i>   | HQ703051 | BCC021-10 |  |
| QW080201  | Wenchang, Hainan (WC)  | 2008 | Qi Li & Xiaodong Zheng   | 10  | <i>Cryptonema producta</i>     | <i>Cryptonema producta</i>       | HQ703052 | BCC022-10 |  |
| QW080202  | Wenchang, Hainan (WC)  | 2008 | Qi Li & Xiaodong Zheng   | 10  | <i>Cryptonema producta</i>     | <i>Cryptonema producta</i>       | HQ703053 | BCC023-10 |  |
| QB080401* | Beihai, Guangxi (BH)   | 2008 | Lingfeng Kong & Jun Chen | 10  | <i>Cryptonema producta</i>     | <i>Cryptonema producta</i>       | HQ703054 | BCC024-10 |  |
| QS080201  | Sanya, Hainan (SY)     | 2008 | Qi Li & Xiaodong Zheng   | 10  | <i>Cryptonema producta</i>     | <i>Cryptonema producta</i>       | HQ703055 | BCC025-10 |  |
| QB100401  | Beihai, Guangxi (BH)   | 2010 | Lingfeng Kong & Jun Chen | 10  | <i>Cryptonema producta</i>     | <i>Cryptonema producta</i>       | HQ703056 | BCC026-10 |  |
| SF080401  | Fanggang, Guangxi (FG) | 2008 | Lingfeng Kong & Jun Chen | N/A | <i>Timoclea</i> sp.            | <i>Timoclea</i> sp. <sup>#</sup> | N/A      | BCC027-10 |  |
| SF080402  | Fanggang, Guangxi (FG) | 2008 | Lingfeng Kong & Jun Chen | N/A | <i>Timoclea</i> sp.            | <i>Timoclea</i> sp. <sup>#</sup> | N/A      | BCC028-10 |  |
| SF080403  | Fanggang, Guangxi (FG) | 2008 | Lingfeng Kong & Jun Chen | N/A | <i>Timoclea</i> sp.            | <i>Timoclea</i> sp. <sup>#</sup> | N/A      | BCC029-10 |  |
| YH080401  | Hebu, Guangxi (HB)     | 2008 | Lingfeng Kong & Jun Chen | 128 | <i>Placamen isabellina</i>     | <i>Placamen isabellina</i>       | HQ703057 | BCC030-10 |  |
| YH080402  | Hebu, Guangxi (HB)     | 2008 | Lingfeng Kong & Jun Chen | 128 | <i>Placamen isabellina</i>     | <i>Placamen isabellina</i>       | HQ703058 | BCC031-10 |  |
| YH080403  | Hebu, Guangxi (HB)     | 2008 | Lingfeng Kong & Jun Chen | 128 | <i>Placamen isabellina</i>     | <i>Placamen isabellina</i>       | HQ703059 | BCC032-10 |  |
| YB080401  | Beihai, Guangxi (BH)   | 2008 | Lingfeng Kong & Jun Chen | 128 | <i>Placamen isabellina</i>     | <i>Placamen isabellina</i>       | HQ703060 | BCC033-10 |  |
| YB080402  | Beihai, Guangxi (BH)   | 2008 | Lingfeng Kong & Jun Chen | 128 | <i>Placamen isabellina</i>     | <i>Placamen isabellina</i>       | HQ703061 | BCC034-10 |  |
| SB080411  | Beihai, Guangxi (BH)   | 2008 | Lingfeng Kong & Jun Chen | 106 | <i>Placamen</i> sp.            | <i>Placamen calophylla</i>       | HQ703062 | BCC035-10 |  |

|           |                           |      |                          |     |                              |                              |          |           |
|-----------|---------------------------|------|--------------------------|-----|------------------------------|------------------------------|----------|-----------|
| SS080401  | Sanya, Hainan (SY)        | 2006 | Rongxiang Gao            | 106 | <i>Placamen</i> sp.          | <i>Placamen calophylla</i>   | HQ703063 | BCC036-10 |
| MF080301  | Fangcheng, Guangxi (FC)   | 2008 | Lingfeng Kong & Jun Chen | 106 | <i>Placamen calophylla</i>   | <i>Placamen calophylla</i>   | HQ703064 | BCC037-10 |
| JH060701  | Haiyang, Shandong (HY)    | 2006 | Qi Li                    | 129 | <i>Protothaca jedoensis</i>  | <i>Protothaca jedoensis</i>  | HQ703065 | BCC038-10 |
| JG080901  | Ganyu, Jiangsu (GY)       | 2008 | Hongtao Nie              | 129 | <i>Protothaca jedoensis</i>  | <i>Protothaca jedoensis</i>  | HQ703066 | BCC039-10 |
| JG080902  | Ganyu, Jiangsu (GY)       | 2008 | Hongtao Nie              | 129 | <i>Protothaca jedoensis</i>  | <i>Protothaca jedoensis</i>  | HQ703067 | BCC040-10 |
| JQ080501  | Qingdao, Shandong (QD)    | 2008 | Jun Chen & Jingbo Wang   | 129 | <i>Protothaca jedoensis</i>  | <i>Protothaca jedoensis</i>  | HQ703068 | BCC041-10 |
| JQ080502* | Qingdao, Shandong (QD)    | 2008 | Jun Chen & Jingbo Wang   | 129 | <i>Protothaca jedoensis</i>  | <i>Protothaca jedoensis</i>  | HQ703069 | BCC042-10 |
| JR100101  | Rushan, Shandong (RS)     | 2010 | Qi Li                    | 129 | <i>Protothaca jedoensis</i>  | <i>Protothaca jedoensis</i>  | HQ703070 | BCC043-10 |
| JL081201  | Lianyugang, Jiangsu (LYG) | 2008 | Hongtao Nie              | 26  | <i>Mercenaria mercenaria</i> | <i>Mercenaria mercenaria</i> | HQ703071 | BCC044-10 |
| JL081202  | Lianyugang, Jiangsu (LYG) | 2008 | Hongtao Nie              | 26  | <i>Mercenaria mercenaria</i> | <i>Mercenaria mercenaria</i> | HQ703072 | BCC045-10 |
| JL081203  | Lianyugang, Jiangsu (LYG) | 2008 | Hongtao Nie              | 26  | <i>Mercenaria mercenaria</i> | <i>Mercenaria mercenaria</i> | HQ703073 | BCC046-10 |
| JL081204  | Lianyugang, Jiangsu (LYG) | 2008 | Hongtao Nie              | 26  | <i>Mercenaria mercenaria</i> | <i>Mercenaria mercenaria</i> | HQ703074 | BCC047-10 |
| JL081205  | Lianyugang, Jiangsu (LYG) | 2008 | Hongtao Nie              | 26  | <i>Mercenaria mercenaria</i> | <i>Mercenaria mercenaria</i> | HQ703075 | BCC048-10 |
| JL081206* | Lianyugang, Jiangsu (LYG) | 2008 | Hongtao Nie              | 26  | <i>Mercenaria mercenaria</i> | <i>Mercenaria mercenaria</i> | HQ703076 | BCC049-10 |

Circinae

|          |                       |      |                          |    |                             |                             |          |           |
|----------|-----------------------|------|--------------------------|----|-----------------------------|-----------------------------|----------|-----------|
| JW080201 | Wenchang, Hainan (WC) | 2008 | Qi Li & Xiaodong Zheng   | 18 | <i>Gafrarium pectinatum</i> | <i>Gafrarium pectinatum</i> | HQ703077 | BCC050-10 |
| JW080202 | Wenchang, Hainan (WC) | 2008 | Qi Li & Xiaodong Zheng   | 18 | <i>Gafrarium pectinatum</i> | <i>Gafrarium pectinatum</i> | HQ703078 | BCC051-10 |
| JQ100401 | Sanya, Hainan (SY)    | 2010 | Lingfeng Kong & Jun Chen | 18 | <i>Gafrarium pectinatum</i> | <i>Gafrarium pectinatum</i> | HQ703079 | BCC052-10 |
| SS100411 | Qionghai, Hainan (QH) | 2010 | Lingfeng Kong & Jun Chen | 18 | <i>Gafrarium</i> sp.1       | <i>Gafrarium pectinatum</i> | HQ703080 | BCC053-10 |
| TW061101 | Wenchang, Hainan (WC) | 2006 | Rongxiang Gao            | 20 | <i>Gafrarium tumidum</i>    | <i>Gafrarium tumidum</i>    | HQ703081 | BCC054-10 |

|          |                           |      |                          |    |                              |                              |          |           |
|----------|---------------------------|------|--------------------------|----|------------------------------|------------------------------|----------|-----------|
| TW061102 | Wenchang, Hainan (WC)     | 2006 | Rongxiang Gao            | 20 | <i>Gafrarium tumidum</i>     | <i>Gafrarium tumidum</i>     | HQ703082 | BCC055-10 |
| TL080301 | Lingao, Hainan (LG)       | 2008 | Qi Li & Xiaodong Zheng   | 20 | <i>Gafrarium tumidum</i>     | <i>Gafrarium tumidum</i>     | HQ703083 | BCC056-10 |
| SS061211 | Sanya, Hainan (SY)        | 2006 | Rongxiang Gao            | 20 | <i>Gafrarium</i> sp.2        | <i>Gafrarium tumidum</i>     | HQ703084 | BCC057-10 |
| SQ100401 | Qionghai, Hainan (QH)     | 2010 | Jun Chen & Jingbo Wang   | 20 | <i>Gafrarium</i> sp.2        | <i>Gafrarium tumidum</i>     | HQ703085 | BCC058-10 |
| KL080301 | Lingao, Hainan (LG)       | 2008 | Qi Li & Xiaodong Zheng   | 16 | <i>Gafrarium dispar</i>      | <i>Gafrarium dispar</i> A    | HQ703086 | BCC059-10 |
| KL080302 | Lingao, Hainan (LG)       | 2008 | Qi Li & Xiaodong Zheng   | 16 | <i>Gafrarium dispar</i>      | <i>Gafrarium dispar</i> A    | HQ703087 | BCC060-10 |
| KL080303 | Lingao, Hainan (LG)       | 2008 | Qi Li & Xiaodong Zheng   | 16 | <i>Gafrarium dispar</i>      | <i>Gafrarium dispar</i> A    | HQ703088 | BCC061-10 |
| KL080304 | Lingao, Hainan (LG)       | 2008 | Qi Li & Xiaodong Zheng   | 16 | <i>Gafrarium dispar</i>      | <i>Gafrarium dispar</i> A    | HQ703089 | BCC062-10 |
| KL080305 | Lingao, Hainan (LG)       | 2008 | Qi Li & Xiaodong Zheng   | 16 | <i>Gafrarium dispar</i>      | <i>Gafrarium dispar</i> A    | HQ703090 | BCC063-10 |
| KW080201 | Wenchang, Hainan (WC)     | 2008 | Qi Li & Xiaodong Zheng   | 16 | <i>Gafrarium dispar</i>      | <i>Gafrarium dispar</i> A    | HQ703091 | BCC064-10 |
| KW080401 | Weizhou, Guangxi (WZ)     | 2008 | Lingfeng Kong & Jun Chen | 16 | <i>Gafrarium dispar</i>      | <i>Gafrarium dispar</i> A    | HQ703092 | BCC065-10 |
| KS100401 | Sanya, Hainan (SY)        | 2010 | Lingfeng Kong & Jun Chen | 16 | <i>Gafrarium dispar</i>      | <i>Gafrarium dispar</i> A    | HQ703093 | BCC066-10 |
| KW100401 | Weizhou, Guangxi (WZ)     | 2010 | Lingfeng Kong & Jun Chen | 19 | <i>Gafrarium dispar</i>      | <i>Gafrarium dispar</i> B    | HQ703094 | BCC067-10 |
| QL080301 | Lingao, Hainan (LG)       | 2008 | Qi Li & Xiaodong Zheng   | 17 | <i>Gafrarium divaricatum</i> | <i>Gafrarium divaricatum</i> | HQ703095 | BCC068-10 |
| QL080501 | Lingao, Hainan (LG)       | 2008 | Lingfeng Kong & Jun Chen | 17 | <i>Gafrarium divaricatum</i> | <i>Gafrarium divaricatum</i> | HQ703096 | BCC069-10 |
| QZ080411 | Zhanjiang, Guangdong (ZJ) | 2008 | Daohai Chen              | 17 | <i>Gafrarium divaricatum</i> | <i>Gafrarium divaricatum</i> | HQ703097 | BCC070-10 |
| QZ080412 | Zhanjiang, Guangdong (ZJ) | 2008 | Daohai Chen              | 17 | <i>Gafrarium divaricatum</i> | <i>Gafrarium divaricatum</i> | HQ703098 | BCC071-10 |
| QZ080413 | Zhanjiang, Guangdong (ZJ) | 2008 | Daohai Chen              | 17 | <i>Gafrarium divaricatum</i> | <i>Gafrarium divaricatum</i> | HQ703099 | BCC072-10 |
| QZ080414 | Zhanjiang, Guangdong (ZJ) | 2008 | Daohai Chen              | 17 | <i>Gafrarium divaricatum</i> | <i>Gafrarium divaricatum</i> | HQ703100 | BCC073-10 |
| QB080411 | Beihai, Guangxi (BH)      | 2008 | Lingfeng Kong & Jun Chen | 17 | <i>Gafrarium divaricatum</i> | <i>Gafrarium divaricatum</i> | HQ703101 | BCC074-10 |

|          |                         |      |                          |    |                              |                              |          |           |
|----------|-------------------------|------|--------------------------|----|------------------------------|------------------------------|----------|-----------|
| QB080412 | Beihai, Guangxi (BH)    | 2008 | Lingfeng Kong & Jun Chen | 17 | <i>Gafrarium divaricatum</i> | <i>Gafrarium divaricatum</i> | HQ703102 | BCC075-10 |
| QP090801 | Pingtian, Fujian (PT)   | 2009 | Qiaozhen Ke              | 17 | <i>Gafrarium divaricatum</i> | <i>Gafrarium divaricatum</i> | HQ703103 | BCC076-10 |
| QB100411 | Beihai, Guangxi (BH)    | 2010 | Lingfeng Kong & Jun Chen | 17 | <i>Gafrarium divaricatum</i> | <i>Gafrarium divaricatum</i> | HQ703104 | BCC077-10 |
| QB100412 | Beihai, Guangxi (BH)    | 2010 | Lingfeng Kong & Jun Chen | 17 | <i>Gafrarium divaricatum</i> | <i>Gafrarium divaricatum</i> | HQ703105 | BCC078-10 |
| QN100401 | Naozhou, Guangdong (NZ) | 2010 | Lingfeng Kong & Jun Chen | 17 | <i>Gafrarium divaricatum</i> | <i>Gafrarium divaricatum</i> | HQ703106 | BCC079-10 |
| MB080401 | Beihai, Guangxi (BH)    | 2008 | Lingfeng Kong & Jun Chen | 7  | <i>Circe scripta</i>         | <i>Circe scripta</i> A       | HQ703107 | BCC080-10 |
| ML080501 | Lingao, Hainan (LG)     | 2008 | Lingfeng Kong & Jun Chen | 7  | <i>Circe scripta</i>         | <i>Circe scripta</i> A       | HQ703108 | BCC081-10 |
| ML080502 | Lingao, Hainan (LG)     | 2008 | Lingfeng Kong & Jun Chen | 7  | <i>Circe scripta</i>         | <i>Circe scripta</i> A       | HQ703109 | BCC082-10 |
| ML061201 | Lingao, Hainan (LG)     | 2006 | Rongxiang Gao            | 7  | <i>Circe scripta</i>         | <i>Circe scripta</i> A       | HQ703110 | BCC083-10 |
| MB100401 | Beihai, Guangxi (BH)    | 2010 | Lingfeng Kong & Jun Chen | 7  | <i>Circe scripta</i>         | <i>Circe scripta</i> A       | HQ703111 | BCC084-10 |
| ML080301 | Lingao, Hainan (LG)     | 2008 | Qi Li & Xiaodong Zheng   | 7  | <i>Circe scripta</i>         | <i>Circe scripta</i> A       | HQ703112 | BCC085-10 |
| MS100401 | Sanya, Hainan (SY)      | 2010 | Lingfeng Kong & Jun Chen | 8  | <i>Circe scripta</i>         | <i>Circe scripta</i> B       | HQ703113 | BCC086-10 |
| ML080201 | Lingshui, Hainan (LS)   | 2008 | Qi Li & Xiaodong Zheng   | 8  | <i>Circe scripta</i>         | <i>Circe scripta</i> B       | HQ703114 | BCC087-10 |

Cyclininae

|          |                          |      |                  |    |                         |                         |          |           |
|----------|--------------------------|------|------------------|----|-------------------------|-------------------------|----------|-----------|
| QD071101 | Zhoushan, Zhejiang (ZS)  | 2007 | Xiaodong Zheng   | 11 | <i>Cyclina sinensis</i> | <i>Cyclina sinensis</i> | HQ703115 | BCC088-10 |
| QS071101 | Shengsi, Zhejiang (SS)   | 2007 | Xiaodong Zheng   | 11 | <i>Cyclina sinensis</i> | <i>Cyclina sinensis</i> | HQ703116 | BCC089-10 |
| QY080201 | Yueqing, Zhejiang (YQ)   | 2008 | Shuangshang Teng | 11 | <i>Cyclina sinensis</i> | <i>Cyclina sinensis</i> | HQ703117 | BCC090-10 |
| QD080701 | Dandong, Liaoning (DD)   | 2008 | Hongtao Nie      | 11 | <i>Cyclina sinensis</i> | <i>Cyclina sinensis</i> | HQ703118 | BCC091-10 |
| QQ060801 | Qinhuangdao, Hebei (QHD) | 2006 | Shikai Liu       | 11 | <i>Cyclina sinensis</i> | <i>Cyclina sinensis</i> | HQ703119 | BCC092-10 |
| QP080901 | Panjin, Liaoning (PJ)    | 2008 | Jie Bai          | 11 | <i>Cyclina sinensis</i> | <i>Cyclina sinensis</i> | HQ703120 | BCC093-10 |

|          |                            |      |                          |    |                         |                         |          |           |
|----------|----------------------------|------|--------------------------|----|-------------------------|-------------------------|----------|-----------|
| QD040401 | Dongxing, Guangxi (DX)     | 2004 | Ying Pan                 | 11 | <i>Cyclina sinensis</i> | <i>Cyclina sinensis</i> | HQ703121 | BCC094-10 |
| QJ060301 | Jimo, Shandong (JM)        | 2006 | Qi Li                    | 11 | <i>Cyclina sinensis</i> | <i>Cyclina sinensis</i> | HQ703122 | BCC095-10 |
| QL080901 | Lianyungang, Jiangsu (LYG) | 2008 | Hongtao Nie              | 11 | <i>Cyclina sinensis</i> | <i>Cyclina sinensis</i> | HQ703123 | BCC096-10 |
| QL050801 | Lvshun, Liaoning (LS)      | 2005 | Yuming Zhao              | 11 | <i>Cyclina sinensis</i> | <i>Cyclina sinensis</i> | HQ703124 | BCC097-10 |
| QM050301 | Maoming, Guangdong (MM)    | 2005 | Ying Pan                 | 11 | <i>Cyclina sinensis</i> | <i>Cyclina sinensis</i> | HQ703125 | BCC098-10 |
| QQ050101 | Qidong, Jiangsu (QD)       | 2005 | Yuming Zhao              | 11 | <i>Cyclina sinensis</i> | <i>Cyclina sinensis</i> | HQ703126 | BCC099-10 |
| QS080501 | Sanya, Hainan (SY)         | 2008 | Lingfeng Kong & Jun Chen | 11 | <i>Cyclina sinensis</i> | <i>Cyclina sinensis</i> | HQ703127 | BCC100-10 |
| QT040401 | Tangu, Tianjing (TG)       | 2004 | Yuming Zhao              | 11 | <i>Cyclina sinensis</i> | <i>Cyclina sinensis</i> | HQ703128 | BCC101-10 |
| QC040401 | Changyi, Shandong (CY)     | 2004 | Yuming Zhao              | 11 | <i>Cyclina sinensis</i> | <i>Cyclina sinensis</i> | HQ703129 | BCC102-10 |
| QX050501 | Xiamen, Fujian (XM)        | 2005 | Ying Pan                 | 11 | <i>Cyclina sinensis</i> | <i>Cyclina sinensis</i> | HQ703130 | BCC103-10 |
| QX070801 | Xiangshui, Jiangsu (XS)    | 2007 | Xiaodong Zheng           | 11 | <i>Cyclina sinensis</i> | <i>Cyclina sinensis</i> | HQ703131 | BCC104-10 |

Dosiniinae

|           |                        |      |                          |     |                             |                            |          |           |
|-----------|------------------------|------|--------------------------|-----|-----------------------------|----------------------------|----------|-----------|
| BF080901* | Fenshui, Shandong (FS) | 2008 | Hongtao Nie              | 124 | <i>Phacosoma biscoticum</i> | <i>Phacosoma fibulum</i>   | HQ703132 | BCC105-10 |
| BC090801  | Changle, Fujian (CL)   | 2009 | Qiaozhen Ke              | 124 | <i>Phacosoma biscoticum</i> | <i>Phacosoma fibulum</i>   | HQ703133 | BCC106-10 |
| XG080901  | Ganyu, Jiangsu (GY)    | 2008 | Hongtao Nie              | 124 | <i>Phacosoma fibulum</i>    | <i>Phacosoma fibulum</i>   | HQ703134 | BCC107-10 |
| XB080301  | Beihai, Guangxi (BH)   | 2008 | Lingfeng Kong & Jun Chen | 124 | <i>Phacosoma fibulum</i>    | <i>Phacosoma fibulum</i>   | HQ703135 | BCC108-10 |
| XB100501  | Beihai, Guangxi (BH)   | 2010 | Lingfeng Kong & Jun Chen | 124 | <i>Phacosoma fibulum</i>    | <i>Phacosoma fibulum</i>   | HQ703136 | BCC109-10 |
| RQ080801  | Qingdao, Shandong (QD) | 2008 | Jun Chen & Yanwei Feng   | 27  | <i>Phacosoma japonicum</i>  | <i>Phacosoma japonicum</i> | HQ703137 | BCC110-10 |
| RQ080802  | Qingdao, Shandong (QD) | 2008 | Jun Chen & Yanwei Feng   | 27  | <i>Phacosoma japonicum</i>  | <i>Phacosoma japonicum</i> | HQ703138 | BCC111-10 |
| SS061201  | Sanya, Hainan (SY)     | 2006 | Rongxiang Gao            | 125 | <i>Phacosoma troscheli</i>  | <i>Phacosoma troscheli</i> | HQ703139 | BCC112-10 |

|              |                           |      |                          |     |                              |                                        |          |           |
|--------------|---------------------------|------|--------------------------|-----|------------------------------|----------------------------------------|----------|-----------|
| SC090801     | Changle, Fujian (CL)      | 2009 | Qiaozhen Ke              | 125 | <i>Phacosoma troscheli</i>   | <i>Phacosoma troscheli</i>             | HQ703140 | BCC113-10 |
| SG080901     | Ganyu, Jiangsu (GY)       | 2008 | Hongtao Nie              | 14  | <i>Dosinella</i> sp.         | <i>Dosinella corrugata</i>             | HQ703141 | BCC114-10 |
| BG080911     | Ganyu, Jiangsu (GY)       | 2009 | Hongtao Nie              | 14  | <i>Dosinella corrugata</i>   | <i>Dosinella corrugata</i>             | HQ703142 | BCC115-10 |
| BP060701     | Pulandian, Liaoning (PLD) | 2006 | Shikai Liu               | 14  | <i>Dosinella corrugata</i>   | <i>Dosinella corrugata</i>             | HQ703143 | BCC116-10 |
| BP060702     | Pulandian, Liaoning (PLD) | 2006 | Shikai Liu               | 14  | <i>Dosinella corrugata</i>   | <i>Dosinella corrugata</i>             | HQ703144 | BCC117-10 |
| BP060703     | Pulandian, Liaoning (PLD) | 2006 | Shikai Liu               | 14  | <i>Dosinella corrugata</i>   | <i>Dosinella corrugata</i>             | HQ703145 | BCC118-10 |
| BP060704*    | Pulandian, Liaoning (PLD) | 2006 | Shikai Liu               | 14  | <i>Dosinella corrugata</i>   | <i>Dosinella corrugata</i>             | HQ703146 | BCC119-10 |
| BW080901*    | Weihai, Shandong (WH)     | 2008 | Yaosen Qian              | 14  | <i>Dosinella corrugata</i> * | <i>Dosinella corrugata</i>             | HQ703147 | BCC120-10 |
| JH060711     | Haikou, Hainan (HK)       | 2006 | Rongxiang Gao            | 13  | <i>Dosinella angulosa</i> *  | <i>Dosinella angulosa</i>              | HQ703148 | BCC121-10 |
| JH060712     | Haikou, Hainan (HK)       | 2006 | Rongxiang Gao            | 13  | <i>Dosinella angulosa</i>    | <i>Dosinella angulosa</i>              | HQ703149 | BCC122-10 |
| JH060713     | Haikou, Hainan (HK)       | 2006 | Rongxiang Gao            | 13  | <i>Dosinella angulosa</i>    | <i>Dosinella angulosa</i>              | HQ703150 | BCC123-10 |
| JH060714     | Haikou, Hainan (HK)       | 2006 | Rongxiang Gao            | 13  | <i>Dosinella angulosa</i>    | <i>Dosinella angulosa</i>              | HQ703151 | BCC124-10 |
| SB080401     | Beihai, Guangxi (BH)      | 2008 | Lingfeng Kong & Jun Chen | 4   | Dosiniinae sp.               | Dosiniinae sp. <sup>#</sup>            | HQ703152 | BCC125-10 |
| SS100411     | Sanya, Hainan (SY)        | 2010 | Lingfeng Kong & Jun Chen | 4   | Dosiniinae sp.               | Dosiniinae sp. <sup>#</sup>            | HQ703153 | BCC126-10 |
| SB100401     | Beihai, Guangxi (BH)      | 2010 | Lingfeng Kong & Jun Chen | 4   | Dosiniinae sp.               | Dosiniinae sp. <sup>#</sup>            | HQ703154 | BCC127-10 |
| SB100411*    | Beihai, Guangxi (BH)      | 2010 | Lingfeng Kong & Jun Chen | 3   | <i>Bonartemis histrio</i>    | <i>Bonartemis histrio</i>              | HQ703155 | BCC128-10 |
| SB100412     | Beihai, Guangxi (BH)      | 2010 | Lingfeng Kong & Jun Chen | 3   | <i>Bonartemis histrio</i>    | <i>Bonartemis histrio</i>              | HQ703156 | BCC129-10 |
| CS080201     | Sanya, Hainan (SY)        | 2008 | Xiaodong Zheng           | 6   | <i>cf. Phacosoma</i> sp.     | <i>cf. Phacosoma</i> sp. <sup>#</sup>  | HQ703157 | BCC130-10 |
| Lioconchinae |                           |      |                          |     |                              |                                        |          |           |
| AS100401     | Sanya, Hainan (SY)        | 2010 | Lingfeng Kong & Jun Chen | 108 | <i>Lioconcha annettae</i>    | <i>Lioconcha annettae</i> <sup>#</sup> | HQ703158 | BCC131-10 |

## Meretricinae

|           |                           |      |                          |     |                             |                               |          |           |
|-----------|---------------------------|------|--------------------------|-----|-----------------------------|-------------------------------|----------|-----------|
| WL061201  | Lingao, Hainan (LG)       | 2006 | Rongxiang Gao            | 113 | <i>Meretrix meretrix</i>    | <i>Meretrix meretrix</i>      | HQ703159 | BCC132-10 |
| WL061202  | Lingao, Hainan (LG)       | 2006 | Rongxiang Gao            | 113 | <i>Meretrix meretrix</i>    | <i>Meretrix meretrix</i>      | HQ703160 | BCC133-10 |
| WL061203  | Lingao, Hainan (LG)       | 2006 | Rongxiang Gao            | 113 | <i>Meretrix meretrix</i>    | <i>Meretrix meretrix</i>      | HQ703161 | BCC134-10 |
| WB080301* | Beihai, Guangxi (BH)      | 2008 | Lingfeng Kong & Jun Chen | 113 | <i>Meretrix meretrix</i>    | <i>Meretrix meretrix</i>      | HQ703162 | BCC135-10 |
| WW061201  | Weizhou, Guangxi (WZ)     | 2006 | Rongxiang Gao            | 113 | <i>Meretrix meretrix</i>    | <i>Meretrix meretrix</i>      | HQ703163 | BCC136-10 |
| DP090401  | Panjin, Liaoning (PJ)     | 2009 | Jie Bai                  | 28  | <i>Meretrix petechialis</i> | <i>Meretrix petechialis</i> A | HQ703164 | BCC137-10 |
| DP090402  | Panjin, Liaoning (PJ)     | 2009 | Jie Bai                  | 28  | <i>Meretrix petechialis</i> | <i>Meretrix petechialis</i> A | HQ703165 | BCC138-10 |
| DG080901  | Ganyu, Jiangsu (GY)       | 2008 | Hongtao Nie              | 28  | <i>Meretrix petechialis</i> | <i>Meretrix petechialis</i> A | HQ703166 | BCC139-10 |
| DG080902* | Ganyu, Jiangsu (GY)       | 2008 | Hongtao Nie              | 28  | <i>Meretrix petechialis</i> | <i>Meretrix petechialis</i> A | HQ703167 | BCC140-10 |
| DG080903  | Ganyu, Jiangsu (GY)       | 2008 | Hongtao Nie              | 28  | <i>Meretrix petechialis</i> | <i>Meretrix petechialis</i> A | HQ703168 | BCC141-10 |
| DN080501  | Nanyang, Jiangsu (NT)     | 2008 | Xiaodong Zheng           | 28  | <i>Meretrix petechialis</i> | <i>Meretrix petechialis</i> A | HQ703169 | BCC142-10 |
| DN080502* | Nanyang, Jiangsu (NT)     | 2008 | Xiaodong Zheng           | 28  | <i>Meretrix petechialis</i> | <i>Meretrix petechialis</i> A | HQ703170 | BCC143-10 |
| DN080503* | Nanyang, Jiangsu (NT)     | 2008 | Xiaodong Zheng           | 28  | <i>Meretrix petechialis</i> | <i>Meretrix petechialis</i> A | HQ703171 | BCC144-10 |
| DF081201  | Fenshui, Shandong (FS)    | 2008 | Hongtao Nie              | 28  | <i>Meretrix petechialis</i> | <i>Meretrix petechialis</i> A | HQ703172 | BCC145-10 |
| DS100401  | Sanya, Hainan (SY)        | 2010 | Lingfeng Kong & Jun Chen | 72  | <i>Meretrix petechialis</i> | <i>Meretrix petechialis</i> B | HQ703173 | BCC146-10 |
| DX061201  | Xiamen, Fujian (XM)       | 2006 | Rongxiang Gao            | 72  | <i>Meretrix petechialis</i> | <i>Meretrix petechialis</i> B | HQ703174 | BCC147-10 |
| DX061202  | Xiamen, Fujian (XM)       | 2006 | Rongxiang Gao            | 72  | <i>Meretrix petechialis</i> | <i>Meretrix petechialis</i> B | HQ703175 | BCC148-10 |
| DZ080401  | Zhanjiang, Guangdong (ZJ) | 2008 | Daohai Chen              | 72  | <i>Meretrix petechialis</i> | <i>Meretrix petechialis</i> B | HQ703176 | BCC149-10 |
| DZ080402  | Zhanjiang, Guangdong (ZJ) | 2008 | Daohai Chen              | 72  | <i>Meretrix petechialis</i> | <i>Meretrix petechialis</i> B | HQ703177 | BCC150-10 |



|           |                           |      |                          |    |                             |                               |          |           |
|-----------|---------------------------|------|--------------------------|----|-----------------------------|-------------------------------|----------|-----------|
| DB100401  | Beihai, Guangxi (BH)      | 2010 | Lingfeng Kong & Jun Chen | 72 | <i>Meretrix petechialis</i> | <i>Meretrix petechialis</i> B | HQ703178 | BCC151-10 |
| DB100402  | Beihai, Guangxi (BH)      | 2010 | Lingfeng Kong & Jun Chen | 72 | <i>Meretrix petechialis</i> | <i>Meretrix petechialis</i> B | HQ703179 | BCC152-10 |
| DS100301  | Shantou, Guangdong (ST)   | 2010 | Qiaozhen Ke              | 72 | <i>Meretrix petechialis</i> | <i>Meretrix petechialis</i> B | HQ703180 | BCC153-10 |
| DH091101  | Haikou, Hainan (HK)       | 2009 | Yuan Yuan                | 72 | <i>Meretrix petechialis</i> | <i>Meretrix petechialis</i> B | HQ703181 | BCC154-10 |
| DH091102* | Haikou, Hainan (HK)       | 2009 | Yuan Yuan                | 72 | <i>Meretrix petechialis</i> | <i>Meretrix petechialis</i> B | HQ703182 | BCC155-10 |
| DL061201  | Lingao, Hainan (LG)       | 2006 | Rongxiang Gao            | 72 | <i>Meretrix petechialis</i> | <i>Meretrix petechialis</i> B | HQ703183 | BCC156-10 |
| DY060901* | Yueqing, Zhejiang (WZ)    | 2006 | Rongxiang Gao            | 72 | <i>Meretrix petechialis</i> | <i>Meretrix petechialis</i> B | HQ703184 | BCC157-10 |
| DB080301  | Beihai, Guangxi (BH)      | 2008 | Qi Li & Xiaodong Zheng   | 72 | <i>Meretrix petechialis</i> | <i>Meretrix petechialis</i> B | HQ703185 | BCC158-10 |
| DB080302* | Beihai, Guangxi (BH)      | 2008 | Qi Li & Xiaodong Zheng   | 72 | <i>Meretrix petechialis</i> | <i>Meretrix petechialis</i> B | HQ703186 | BCC159-10 |
| DY080201  | Yangjiang, Guangdong (YJ) | 2008 | Daohai Chen              | 72 | <i>Meretrix petechialis</i> | <i>Meretrix petechialis</i> B | HQ703187 | BCC160-10 |
| FH061201  | Haikou, Hainan (HK)       | 2006 | Rongxiang Gao            | 97 | <i>Meretrix lamarckii</i>   | <i>Meretrix lamarckii</i>     | HQ703188 | BCC161-10 |
| FH061202  | Haikou, Hainan (HK)       | 2006 | Rongxiang Gao            | 97 | <i>Meretrix lamarckii</i>   | <i>Meretrix lamarckii</i>     | HQ703189 | BCC162-10 |
| FH061203  | Haikou, Hainan (HK)       | 2006 | Rongxiang Gao            | 97 | <i>Meretrix lamarckii</i>   | <i>Meretrix lamarckii</i>     | HQ703190 | BCC163-10 |
| FS100401  | Sanya, Hainan (SY)        | 2010 | Lingfeng Kong & Jun Chen | 97 | <i>Meretrix lamarckii</i>   | <i>Meretrix lamarckii</i>     | HQ703191 | BCC164-10 |
| QZ061201  | Zhangpu, Fujian (ZP)      | 2006 | Rongxiang Gao            | 98 | <i>Meretrix lyrata</i>      | <i>Meretrix lyrata</i>        | HQ703192 | BCC165-10 |
| QZ061202  | Zhangpu, Fujian (ZP)      | 2006 | Rongxiang Gao            | 98 | <i>Meretrix lyrata</i>      | <i>Meretrix lyrata</i>        | HQ703193 | BCC166-10 |
| QZ080401  | Zhanjiang, Guangdong (ZJ) | 2008 | Daohai Chen              | 98 | <i>Meretrix lyrata</i>      | <i>Meretrix lyrata</i>        | HQ703194 | BCC167-10 |
| QS061201  | Sanya, Hainan (SY)        | 2006 | Rongxiang Gao            | 98 | <i>Meretrix lyrata</i>      | <i>Meretrix lyrata</i>        | HQ703195 | BCC168-10 |
| QS061202  | Sanya, Hainan (SY)        | 2006 | Rongxiang Gao            | 98 | <i>Meretrix lyrata</i>      | <i>Meretrix lyrata</i>        | HQ703196 | BCC169-10 |
| QB080421  | Beihai, Guangxi (BH)      | 2008 | Lingfeng Kong & Jun Chen | 98 | <i>Meretrix lyrata</i>      | <i>Meretrix lyrata</i>        | HQ703197 | BCC170-10 |

|          |                       |      |                          |     |                        |                                  |          |           |
|----------|-----------------------|------|--------------------------|-----|------------------------|----------------------------------|----------|-----------|
| QW080211 | Wenchang, Hainan (WC) | 2008 | Qi Li & Xiaodong Zheng   | 98  | <i>Meretrix lyrata</i> | <i>Meretrix lyrata</i>           | HQ703198 | BCC171-10 |
| CB080411 | Beihai, Guangxi (BH)  | 2008 | Lingfeng Kong & Jun Chen | 114 | <i>Meretrix</i> sp.    | <i>Meretrix</i> sp. <sup>#</sup> | HQ703199 | BCC172-10 |
| CH080401 | Hepu, Guangxi (HP)    | 2008 | Lingfeng Kong & Jun Chen | 114 | <i>Meretrix</i> sp.    | <i>Meretrix</i> sp. <sup>#</sup> | HQ703200 | BCC173-10 |
| CH080402 | Hepu, Guangxi (HP)    | 2008 | Lingfeng Kong & Jun Chen | 114 | <i>Meretrix</i> sp.    | <i>Meretrix</i> sp. <sup>#</sup> | HQ703201 | BCC174-10 |
| CH080403 | Hepu, Guangxi (HP)    | 2008 | Lingfeng Kong & Jun Chen | 114 | <i>Meretrix</i> sp.    | <i>Meretrix</i> sp. <sup>#</sup> | HQ703202 | BCC175-10 |

Pitarinae

|          |                        |      |                          |     |                             |                                  |          |           |
|----------|------------------------|------|--------------------------|-----|-----------------------------|----------------------------------|----------|-----------|
| XS080501 | Sanya, Hainan (SY)     | 2008 | Lingfeng Kong & Jun Chen | 101 | <i>Pitarina striatum</i>    | <i>Pitarina striatum</i>         | HQ703203 | BCC176-10 |
| XS080502 | Sanya, Hainan (SY)     | 2008 | Lingfeng Kong & Jun Chen | 101 | <i>Pitarina striatum</i>    | <i>Pitarina striatum</i>         | HQ703204 | BCC177-10 |
| XS080503 | Sanya, Hainan (SY)     | 2008 | Lingfeng Kong & Jun Chen | 101 | <i>Pitarina striatum</i>    | <i>Pitarina striatum</i>         | HQ703205 | BCC178-10 |
| RS061201 | Sanya, Hainan (SY)     | 2006 | Rongxiang Gao            | 126 | <i>Pitarina japonica</i>    | <i>Pitarina japonica</i>         | HQ703206 | BCC179-10 |
| RL080501 | Lingao, Hainan (LG)    | 2008 | Lingfeng Kong & Jun Chen | 126 | <i>Pitarina japonica</i>    | <i>Pitarina japonica</i>         | HQ703207 | BCC180-10 |
| SB100421 | Beihai, Guangxi (BH)   | 2010 | Lingfeng Kong & Jun Chen | 127 | <i>Pitarina</i> sp.         | <i>Pitarina</i> sp. <sup>#</sup> | HQ703208 | BCC181-10 |
| SQ080601 | Qingdao, Shandong (QD) | 2008 | Jun Chen & Jingbo Wang   | 122 | <i>Pelecypora isocardia</i> | <i>Pelecypora isocardia</i>      | HQ703209 | BCC182-10 |
| SF080901 | Fenshui, Shandong (FS) | 2008 | Hongtao Nie              | 122 | <i>Pelecypora isocardia</i> | <i>Pelecypora isocardia</i>      | HQ703210 | BCC183-10 |

Sunettinae

|          |                        |      |                                   |     |                                 |                                      |          |           |
|----------|------------------------|------|-----------------------------------|-----|---------------------------------|--------------------------------------|----------|-----------|
| SN100601 | Nanji, Zhejiang (NJ)   | 2010 | Xiaodong Zheng &<br>Lingfeng Kong | 131 | <i>Cyclosunetta</i> sp.         | <i>Cyclosunetta</i> sp. <sup>#</sup> | HQ703211 | BCC184-10 |
| SN100602 | Nanji, Zhejiang (NJ)   | 2010 | Xiaodong Zheng &<br>Lingfeng Kong | 131 | <i>Cyclosunetta</i> sp.         | <i>Cyclosunetta</i> sp. <sup>#</sup> | HQ703212 | BCC185-10 |
| XF080601 | Fenshui, Shandong (FS) | 2008 | Hongtao Nie                       | 12  | <i>Cyclosunetta menstrualis</i> | <i>Cyclosunetta menstrualis</i>      | HQ703213 | BCC186-10 |
| XF080602 | Fenshui, Shandong (FS) | 2008 | Hongtao Nie                       | 12  | <i>Cyclosunetta menstrualis</i> | <i>Cyclosunetta menstrualis</i>      | HQ703214 | BCC187-10 |
| XF080603 | Fenshui, Shandong (FS) | 2008 | Hongtao Nie                       | 12  | <i>Cyclosunetta menstrualis</i> | <i>Cyclosunetta menstrualis</i>      | HQ703215 | BCC188-10 |

|           |           |                         |      |                          |     |                                                                              |                                 |          |           |
|-----------|-----------|-------------------------|------|--------------------------|-----|------------------------------------------------------------------------------|---------------------------------|----------|-----------|
|           | XF080604  | Fenshui, Shandong (FS)  | 2008 | Hongtao Nie              | 12  | <i>Cyclosunetta menstrualis</i>                                              | <i>Cyclosunetta menstrualis</i> | HQ703216 | BCC189-10 |
| Tapetinae |           |                         |      |                          |     |                                                                              |                                 |          |           |
|           | ZS080201  | Sanya, Hainan (SY)      | 2008 | Qi Li & Xiaodong Zheng   | 130 | <i>Tapes literatus</i>                                                       | <i>Tapes literatus</i>          | HQ703217 | BCC190-10 |
|           | ZL080201  | Lingshui, Hainan (LS)   | 2008 | Qi Li & Xiaodong Zheng   | 130 | <i>Tapes literatus</i><br>( <i>punctata</i> morph)                           | <i>Tapes literatus</i>          | HQ703218 | BCC191-10 |
|           | ZL080202  | Lingshui, Hainan (LS)   | 2008 | Qi Li & Xiaodong Zheng   | 130 | <i>Tapes literatus</i><br>( <i>punctata</i> morph)                           | <i>Tapes literatus</i>          | HQ703219 | BCC192-10 |
|           | ZW080501  | Wenchang, Hainan (WC)   | 2008 | Lingfeng Kong & Jun Chen | 130 | <i>Tapes literatus</i><br>( <i>punctata</i> morph)                           | <i>Tapes literatus</i>          | HQ703220 | BCC193-10 |
|           | ZW080502  | Wenchang, Hainan (WC)   | 2008 | Lingfeng Kong & Jun Chen | 130 | <i>Tapes literatus</i><br><i>Tapes literatus</i><br>( <i>punctata</i> morph) | <i>Tapes literatus</i>          | HQ703221 | BCC194-10 |
|           | ZS061201  | Sanya, Hainan (SY)      | 2006 | Rongxiang Gao            | 130 | <i>Tapes literatus</i><br>( <i>punctata</i> morph)                           | <i>Tapes literatus</i>          | HQ703222 | BCC195-10 |
|           | ZS061202  | Sanya, Hainan (SY)      | 2006 | Rongxiang Gao            | 130 | <i>Tapes literatus</i><br>( <i>punctata</i> morph)                           | <i>Tapes literatus</i>          | HQ703223 | BCC196-10 |
|           | DH080401  | Hebu, Guangxi (HB)      | 2008 | Lingfeng Kong & Jun Chen | 94  | <i>Tapes dorsatus</i>                                                        | <i>Tapes dorsatus</i>           | HQ703224 | BCC197-10 |
|           | DH080402  | Hebu, Guangxi (HB)      | 2008 | Lingfeng Kong & Jun Chen | 94  | <i>Tapes dorsatus</i>                                                        | <i>Tapes dorsatus</i>           | HQ703225 | BCC198-10 |
|           | DH080403  | Hebu, Guangxi (HB)      | 2008 | Lingfeng Kong & Jun Chen | 94  | <i>Tapes dorsatus</i>                                                        | <i>Tapes dorsatus</i>           | HQ703226 | BCC199-10 |
|           | DH080404  | Hebu, Guangxi (HB)      | 2008 | Lingfeng Kong & Jun Chen | 94  | <i>Tapes dorsatus</i>                                                        | <i>Tapes dorsatus</i>           | HQ703227 | BCC200-10 |
|           | DB080401* | Beihai, Guangxi (BH)    | 2008 | Lingfeng Kong & Jun Chen | 94  | <i>Tapes dorsatus</i>                                                        | <i>Tapes dorsatus</i>           | HQ703228 | BCC201-10 |
|           | DB080201* | Beihai, Guangxi (BH)    | 2008 | Qi Li & Xiaodong Zheng   | 94  | <i>Tapes dorsatus</i>                                                        | <i>Tapes dorsatus</i>           | HQ703229 | BCC202-10 |
|           | DB080202* | Beihai, Guangxi (BH)    | 2008 | Qi Li & Xiaodong Zheng   | 94  | <i>Tapes dorsatus</i>                                                        | <i>Tapes dorsatus</i>           | HQ703230 | BCC203-10 |
|           | QP090811  | Pingtang, Fujian (PT)   | 2009 | Qiaozhen Ke              | 119 | <i>Paphia sinuosa</i>                                                        | <i>Paphia sinuosa</i>           | HQ703231 | BCC204-10 |
|           | JP090801  | Pingtang, Fujian (PT)   | 2009 | Qiaozhen Ke              | 116 | <i>Paphia gallus</i>                                                         | <i>Paphia gallus</i> A          | HQ703232 | BCC205-10 |
|           | JB080201  | Baimajing, Hainan (BMJ) | 2008 | Qi Li & Xiaodong Zheng   | 96  | <i>Paphia gallus</i>                                                         | <i>Paphia gallus</i> B          | HQ703233 | BCC206-10 |
|           | JB080202  | Beihai, Guangxi (BH)    | 2008 | Lingfeng Kong & Jun Chen | 96  | <i>Paphia gallus</i>                                                         | <i>Paphia gallus</i> B          | HQ703234 | BCC207-10 |

|           |                           |      |                           |     |                            |                            |          |           |
|-----------|---------------------------|------|---------------------------|-----|----------------------------|----------------------------|----------|-----------|
| JB080203  | Beihai, Guangxi (BH)      | 2008 | Lingfeng Kong & Jun Chen  | 96  | <i>Paphia gallus</i>       | <i>Paphia gallus</i> B     | HQ703235 | BCC208-10 |
| ZS061211  | Sanya, Hainan (SY)        | 2006 | Rongxiang Gao             | 120 | <i>Paphia textile</i>      | <i>Paphia textile</i>      | HQ703236 | BCC209-10 |
| ZB080311  | Beihai, Guangxi (BH)      | 2008 | Lingfeng Kong & Jun Chen  | 120 | <i>Paphia textile</i>      | <i>Paphia textile</i>      | HQ703237 | BCC210-10 |
| BW080911  | Weihai, Shandong (WZ)     | 2008 | Yaosen Qian               | 117 | <i>Paphia papilionacea</i> | <i>Paphia papilionacea</i> | HQ703238 | BCC211-10 |
| BW080912  | Weihai, Shandong (WZ)     | 2008 | Yaosen Qian               | 117 | <i>Paphia papilionacea</i> | <i>Paphia papilionacea</i> | HQ703239 | BCC212-10 |
| BW080913  | Weihai, Shandong (WZ)     | 2008 | Yaosen Qian               | 117 | <i>Paphia papilionacea</i> | <i>Paphia papilionacea</i> | HQ703240 | BCC213-10 |
| BW080914  | Weihai, Shandong (WZ)     | 2008 | Yaosen Qian               | 117 | <i>Paphia papilionacea</i> | <i>Paphia papilionacea</i> | HQ703241 | BCC214-10 |
| BQ080401  | Qingdao, Shandong (QD)    | 2008 | Jingbo Wang & Yanwei Feng | 117 | <i>Paphia papilionacea</i> | <i>Paphia papilionacea</i> | HQ703242 | BCC215-10 |
| BQ080402  | Qingdao, Shandong (QD)    | 2008 | Jingbo Wang & Yanwei Feng | 117 | <i>Paphia papilionacea</i> | <i>Paphia papilionacea</i> | HQ703243 | BCC216-10 |
| BY080201  | Yangjiang, Guangdong (YJ) | 2008 | Daohai Chen               | 121 | <i>Paphia undulata</i>     | <i>Paphia undulata</i>     | HQ703244 | BCC217-10 |
| BF080911  | Fanggang, Guangxi (FG)    | 2008 | Lingfeng Kong & Jun Chen  | 121 | <i>Paphia undulata</i>     | <i>Paphia undulata</i>     | HQ703245 | BCC218-10 |
| BF080912  | Fanggang, Guangxi (FG)    | 2008 | Lingfeng Kong & Jun Chen  | 121 | <i>Paphia undulata</i>     | <i>Paphia undulata</i>     | HQ703246 | BCC219-10 |
| BB080401* | Beihai, Guangxi (BH)      | 2008 | Lingfeng Kong & Jun Chen  | 121 | <i>Paphia undulata</i>     | <i>Paphia undulata</i>     | HQ703247 | BCC220-10 |
| BS100301  | Shantou, Guangdong (ST)   | 2010 | Qiaozhen Ke               | 121 | <i>Paphia undulata</i>     | <i>Paphia undulata</i>     | HQ703248 | BCC221-10 |
| HB080301  | Beihai, Guangxi (BH)      | 2008 | Qi Li & Xiaodong Zheng    | 115 | <i>Paphia amabilis</i> ※   | <i>Paphia amabilis</i>     | HQ703249 | BCC222-10 |
| HB080302  | Beihai, Guangxi (BH)      | 2008 | Qi Li & Xiaodong Zheng    | 115 | <i>Paphia amabilis</i> ※   | <i>Paphia amabilis</i>     | HQ703250 | BCC223-10 |
| HB080303  | Beihai, Guangxi (BH)      | 2008 | Qi Li & Xiaodong Zheng    | 115 | <i>Paphia amabilis</i>     | <i>Paphia amabilis</i>     | HQ703251 | BCC224-10 |
| HB080304  | Beihai, Guangxi (BH)      | 2008 | Qi Li & Xiaodong Zheng    | 115 | <i>Paphia amabilis</i> ※   | <i>Paphia amabilis</i>     | HQ703252 | BCC225-10 |
| HB080305  | Beihai, Guangxi (BH)      | 2008 | Qi Li & Xiaodong Zheng    | 115 | <i>Paphia amabilis</i>     | <i>Paphia amabilis</i>     | HQ703253 | BCC226-10 |
| HB080306  | Beihai, Guangxi (BH)      | 2008 | Qi Li & Xiaodong Zheng    | 115 | <i>Paphia amabilis</i>     | <i>Paphia amabilis</i>     | HQ703254 | BCC227-10 |

|           |                         |      |                          |     |                                     |                                |          |           |
|-----------|-------------------------|------|--------------------------|-----|-------------------------------------|--------------------------------|----------|-----------|
| HB080307  | Beihai, Guangxi (BH)    | 2008 | Qi Li & Xiaodong Zheng   | 115 | <i>Paphia amabilis</i> <sup>※</sup> | <i>Paphia amabilis</i>         | HQ703255 | BCC228-10 |
| HW061101  | Wenchang, Hainan (WC)   | 2006 | Rongxiang Gao            | 115 | <i>Paphia amabilis</i> <sup>※</sup> | <i>Paphia amabilis</i>         | HQ703256 | BCC229-10 |
| HS080201  | Sanya, Hainan (SY)      | 2008 | Qi Li & Xiaodong Zheng   | 115 | <i>Paphia amabilis</i> <sup>※</sup> | <i>Paphia amabilis</i>         | HQ703257 | BCC230-10 |
| HS080202  | Sanya, Hainan (SY)      | 2008 | Qi Li & Xiaodong Zheng   | 115 | <i>Paphia amabilis</i> <sup>※</sup> | <i>Paphia amabilis</i>         | HQ703258 | BCC231-10 |
| HS080203  | Sanya, Hainan (SY)      | 2008 | Qi Li & Xiaodong Zheng   | 115 | <i>Paphia amabilis</i> <sup>※</sup> | <i>Paphia amabilis</i>         | HQ703259 | BCC232-10 |
| HW080401  | Weizhou, Guangxi (WZ)   | 2008 | Lingfeng Kong & Jun Chen | 115 | <i>Paphia amabilis</i>              | <i>Paphia amabilis</i>         | HQ703260 | BCC233-10 |
| HW080402* | Weizhou, Guangxi (WZ)   | 2008 | Lingfeng Kong & Jun Chen | 115 | <i>Paphia amabilis</i>              | <i>Paphia amabilis</i>         | HQ703261 | BCC234-10 |
| HW080403  | Weizhou, Guangxi (WZ)   | 2008 | Lingfeng Kong & Jun Chen | 115 | <i>Paphia amabilis</i>              | <i>Paphia amabilis</i>         | HQ703262 | BCC235-10 |
| HB080311  | Beihai, Guangxi (BH)    | 2008 | Lingfeng Kong & Jun Chen | 118 | <i>Paphia semirugata</i>            | <i>Paphia semirugata</i>       | HQ703263 | BCC236-10 |
| HB080312  | Beihai, Guangxi (BH)    | 2008 | Lingfeng Kong & Jun Chen | 118 | <i>Paphia semirugata</i>            | <i>Paphia semirugata</i>       | HQ703264 | BCC237-10 |
| HB080313  | Beihai, Guangxi (BH)    | 2008 | Lingfeng Kong & Jun Chen | 118 | <i>Paphia semirugata</i>            | <i>Paphia semirugata</i>       | HQ703265 | BCC238-10 |
| SH060501  | Haiyang, Shangdong (HY) | 2006 | Ruihai Yu                | 110 | <i>Macridiscus aequilatera</i>      | <i>Macridiscus aequilatera</i> | HQ703266 | BCC239-10 |
| SH060502  | Haiyang, Shangdong (HY) | 2006 | Ruihai Yu                | 110 | <i>Macridiscus aequilatera</i>      | <i>Macridiscus aequilatera</i> | HQ703267 | BCC240-10 |
| SH060503  | Haiyang, Shangdong (HY) | 2006 | Ruihai Yu                | 110 | <i>Macridiscus aequilatera</i>      | <i>Macridiscus aequilatera</i> | HQ703268 | BCC241-10 |
| SH080801  | Haiyang, Shangdong (HY) | 2008 | Qi Li                    | 110 | <i>Macridiscus aequilatera</i>      | <i>Macridiscus aequilatera</i> | HQ703269 | BCC242-10 |
| SH080802  | Haiyang, Shangdong (HY) | 2008 | Qi Li                    | 110 | <i>Macridiscus aequilatera</i>      | <i>Macridiscus aequilatera</i> | HQ703270 | BCC243-10 |
| SH080803  | Haiyang, Shangdong (HY) | 2008 | Qi Li                    | 110 | <i>Macridiscus aequilatera</i>      | <i>Macridiscus aequilatera</i> | HQ703271 | BCC244-10 |
| SH080804* | Haiyang, Shangdong (HY) | 2008 | Qi Li                    | 110 | <i>Macridiscus aequilatera</i>      | <i>Macridiscus aequilatera</i> | HQ703272 | BCC245-10 |
| HW080411  | Weihai, Shandong (WZ)   | 2008 | Qi Li                    | 24  | <i>Macridiscus melanaegis</i>       | <i>Macridiscus melanaegis</i>  | HQ703273 | BCC246-10 |
| HW080412  | Weihai, Shandong (WZ)   | 2008 | Qi Li                    | 24  | <i>Macridiscus melanaegis</i>       | <i>Macridiscus melanaegis</i>  | HQ703274 | BCC247-10 |

|           |                           |      |                          |     |                                   |                                   |          |           |
|-----------|---------------------------|------|--------------------------|-----|-----------------------------------|-----------------------------------|----------|-----------|
| BY080211  | Yangjiang, Guangdong (YJ) | 2008 | Daohai Chen              | 109 | <i>Macridiscus semicancellata</i> | <i>Macridiscus semicancellata</i> | HQ703275 | BCC248-10 |
| BB080201  | Beihai, Guangxi (BH)      | 2008 | Qi Li & Xiaodong Zheng   | 109 | <i>Macridiscus semicancellata</i> | <i>Macridiscus semicancellata</i> | HQ703276 | BCC249-10 |
| BB080202  | Beihai, Guangxi (BH)      | 2008 | Qi Li & Xiaodong Zheng   | 109 | <i>Macridiscus semicancellata</i> | <i>Macridiscus semicancellata</i> | HQ703277 | BCC250-10 |
| BB080203  | Beihai, Guangxi (BH)      | 2008 | Qi Li & Xiaodong Zheng   | 109 | <i>Macridiscus semicancellata</i> | <i>Macridiscus semicancellata</i> | HQ703278 | BCC251-10 |
| BB080204* | Beihai, Guangxi (BH)      | 2008 | Qi Li & Xiaodong Zheng   | 109 | <i>Macridiscus semicancellata</i> | <i>Macridiscus semicancellata</i> | HQ703279 | BCC252-10 |
| BB100401  | Beihai, Guangxi (BH)      | 2010 | Lingfeng Kong & Jun Chen | 109 | <i>Macridiscus semicancellata</i> | <i>Macridiscus semicancellata</i> | HQ703280 | BCC253-10 |
| BP090801  | Pingtang, Fujian (PT)     | 2009 | Qiaozhen Ke              | 109 | <i>Macridiscus semicancellata</i> | <i>Macridiscus semicancellata</i> | HQ703281 | BCC254-10 |
| RS080501  | Sanya, Hainan (SY)        | 2008 | Lingfeng Kong & Jun Chen | 95  | <i>Marcia japonica</i>            | <i>Marcia japonica</i>            | HQ703282 | BCC255-10 |
| RS080502  | Sanya, Hainan (SY)        | 2008 | Lingfeng Kong & Jun Chen | 95  | <i>Marcia japonica</i>            | <i>Marcia japonica</i>            | HQ703283 | BCC256-10 |
| RS080503  | Sanya, Hainan (SY)        | 2008 | Lingfeng Kong & Jun Chen | 95  | <i>Marcia japonica</i>            | <i>Marcia japonica</i>            | HQ703284 | BCC257-10 |
| RW061101  | Wenchang, Hainan (WC)     | 2006 | Rongxiang Gao            | 95  | <i>Marcia japonica</i>            | <i>Marcia japonica</i>            | HQ703285 | BCC258-10 |
| RW061102  | Wenchang, Hainan (WC)     | 2006 | Rongxiang Gao            | 95  | <i>Marcia japonica</i>            | <i>Marcia japonica</i>            | HQ703286 | BCC259-10 |
| LL061211  | Lingshui, Hainan (LS)     | 2008 | Qi Li & Xiaodong Zheng   | 111 | <i>Marcia hiantina</i>            | <i>Marcia hiantina</i>            | HQ703287 | BCC260-10 |
| LZ080401  | Zhanjiang, Guangdong (ZJ) | 2008 | Daohai Chen              | 111 | <i>Marcia hiantina</i>            | <i>Marcia hiantina</i>            | HQ703288 | BCC261-10 |
| LM050401  | Maoming, Guangdong (MM)   | 2005 | Ying Pan                 | 111 | <i>Marcia hiantina</i>            | <i>Marcia hiantina</i>            | HQ703289 | BCC262-10 |
| LB080401  | Beihai, Guangxi (BH)      | 2008 | Lingfeng Kong & Jun Chen | 111 | <i>Marcia hiantina</i>            | <i>Marcia hiantina</i>            | HQ703290 | BCC263-10 |
| LB080402  | Beihai, Guangxi (BH)      | 2008 | Lingfeng Kong & Jun Chen | 111 | <i>Marcia hiantina</i>            | <i>Marcia hiantina</i>            | HQ703291 | BCC264-10 |
| LS080211* | Sanya, Hainan (SY)        | 2008 | Qi Li & Xiaodong Zheng   | 111 | <i>Marcia hiantina</i>            | <i>Marcia hiantina</i>            | HQ703292 | BCC265-10 |
| LS080212  | Sanya, Hainan (SY)        | 2008 | Qi Li & Xiaodong Zheng   | 111 | <i>Marcia hiantina</i>            | <i>Marcia hiantina</i>            | HQ703293 | BCC266-10 |
| LS080213* | Sanya, Hainan (SY)        | 2008 | Qi Li & Xiaodong Zheng   | 111 | <i>Marcia hiantina</i>            | <i>Marcia hiantina</i>            | HQ703294 | BCC267-10 |

|           |                          |      |                          |     |                                |                                |          |           |
|-----------|--------------------------|------|--------------------------|-----|--------------------------------|--------------------------------|----------|-----------|
| SW061101  | Wenchang, Hainan (WC)    | 2006 | Rongxiang Gao            | 111 | <i>Marcia</i> sp.1             | <i>Marcia hiantina</i>         | HQ703295 | BCC268-10 |
| LS080221  | Sanya, Hainan (SY)       | 2008 | Qi Li & Xiaodong Zheng   | 112 | <i>Marcia</i> sp.2             | <i>Marcia marmorata</i>        | HQ703296 | BCC269-10 |
| LS080222  | Sanya, Hainan (SY)       | 2008 | Qi Li & Xiaodong Zheng   | 112 | <i>Marcia marmorata</i>        | <i>Marcia marmorata</i>        | HQ703297 | BCC270-10 |
| LB080201  | Beihai, Guangxi (BH)     | 2008 | Qi Li & Xiaodong Zheng   | 112 | <i>Marcia marmorata</i>        | <i>Marcia marmorata</i>        | HQ703298 | BCC271-10 |
| LB080202  | Beihai, Guangxi (BH)     | 2008 | Qi Li & Xiaodong Zheng   | 112 | <i>Marcia marmorata</i>        | <i>Marcia marmorata</i>        | HQ703299 | BCC272-10 |
| LB080203* | Beihai, Guangxi (BH)     | 2008 | Qi Li & Xiaodong Zheng   | 112 | <i>Marcia marmorata</i>        | <i>Marcia marmorata</i>        | HQ703300 | BCC273-10 |
| LB080411  | Beihai, Guangxi (BH)     | 2008 | Lingfeng Kong & Jun Chen | 112 | <i>Marcia marmorata</i>        | <i>Marcia marmorata</i>        | HQ703301 | BCC274-10 |
| LB080412  | Beihai, Guangxi (BH)     | 2008 | Lingfeng Kong & Jun Chen | 112 | <i>Marcia marmorata</i>        | <i>Marcia marmorata</i>        | HQ703302 | BCC275-10 |
| SB080201  | Baimajing, Hainan (BMJ)  | 2008 | Qi Li & Xiaodong Zheng   | 112 | <i>Marcia</i> sp.2             | <i>Marcia marmorata</i>        | HQ703303 | BCC276-10 |
| FJ080801* | Jimo, Shandong (JM)      | 2008 | Lingfeng Kong & Jun Chen | 21  | <i>Ruditapes philippinarum</i> | <i>Ruditapes philippinarum</i> | HQ703304 | BCC277-10 |
| FR080901  | Rongcheng, Shandong (RC) | 2008 | Lingfeng Kong & Jun Chen | 21  | <i>Ruditapes philippinarum</i> | <i>Ruditapes philippinarum</i> | HQ703305 | BCC278-10 |
| FZ061201  | Zhangpu, Fujian (ZP)     | 2006 | Rongxiang Gao            | 21  | <i>Ruditapes philippinarum</i> | <i>Ruditapes philippinarum</i> | HQ703306 | BCC279-10 |
| FZ061202  | Zhangpu, Fujian (ZP)     | 2006 | Rongxiang Gao            | 21  | <i>Ruditapes philippinarum</i> | <i>Ruditapes philippinarum</i> | HQ703307 | BCC280-10 |
| FY081101  | Shenzhen, Guangdong (SZ) | 2008 | Wenguang Liu             | 21  | <i>Ruditapes philippinarum</i> | <i>Ruditapes philippinarum</i> | HQ703308 | BCC281-10 |
| FG080901  | Ganyu, Jiangsu (GY)      | 2008 | Hongtao Nie              | 21  | <i>Ruditapes philippinarum</i> | <i>Ruditapes philippinarum</i> | HQ703309 | BCC282-10 |
| FN070601* | Nanji, Zhejiang (NJ)     | 2007 | Xiaodong Zheng           | 21  | <i>Ruditapes philippinarum</i> | <i>Ruditapes philippinarum</i> | HQ703310 | BCC283-10 |
| FB080201  | Baimajing, Hainan (BMJ)  | 2008 | Qi Li & Xiaodong Zheng   | 21  | <i>Ruditapes philippinarum</i> | <i>Ruditapes philippinarum</i> | HQ703311 | BCC284-10 |
| ZB080401  | Beihai, Guangxi (BH)     | 2007 | Lingfeng Kong & Jun Chen | 55  | <i>Ruditapes variegata</i>     | <i>Ruditapes variegata</i>     | HQ703312 | BCC285-10 |
| ZB080402  | Beihai, Guangxi (BH)     | 2008 | Lingfeng Kong & Jun Chen | 55  | <i>Ruditapes variegata</i>     | <i>Ruditapes variegata</i>     | HQ703313 | BCC286-10 |
| ZW080401  | Weizhou, Guangxi (WZ)    | 2008 | Lingfeng Kong & Jun Chen | 55  | <i>Ruditapes variegata</i>     | <i>Ruditapes variegata</i>     | HQ703314 | BCC287-10 |

|           |          |                       |      |                          |     |                              |                              |          |           |
|-----------|----------|-----------------------|------|--------------------------|-----|------------------------------|------------------------------|----------|-----------|
|           | ZS080211 | Sanya, Hainan (SY)    | 2008 | Qi Li & Xiaodong Zheng   | 55  | <i>Ruditapes variegata</i>   | <i>Ruditapes variegata</i>   | HQ703315 | BCC288-10 |
|           | ZS080212 | Sanya, Hainan (SY)    | 2008 | Qi Li & Xiaodong Zheng   | 55  | <i>Ruditapes variegata</i>   | <i>Ruditapes variegata</i>   | HQ703316 | BCC289-10 |
|           | ZW100401 | Weizhou, Guangxi (WZ) | 2010 | Lingfeng Kong & Jun Chen | 55  | <i>Ruditapes variegata</i>   | <i>Ruditapes variegata</i>   | HQ703317 | BCC290-10 |
| Venerinae |          |                       |      |                          |     |                              |                              |          |           |
|           | ZS080501 | Sanya, Hainan (SY)    | 2008 | Lingfeng Kong & Jun Chen | 102 | <i>Periglypta puerpera</i>   | <i>Periglypta puerpera</i> A | HQ703318 | BCC291-10 |
|           | ZS080502 | Sanya, Hainan (SY)    | 2008 | Lingfeng Kong & Jun Chen | 102 | <i>Periglypta puerpera</i>   | <i>Periglypta puerpera</i> A | HQ703319 | BCC292-10 |
|           | ZS080503 | Sanya, Hainan (SY)    | 2008 | Lingfeng Kong & Jun Chen | 102 | <i>Periglypta puerpera</i>   | <i>Periglypta puerpera</i> A | HQ703320 | BCC293-10 |
|           | ZS080504 | Sanya, Hainan (SY)    | 2008 | Lingfeng Kong & Jun Chen | 102 | <i>Periglypta puerpera</i>   | <i>Periglypta puerpera</i> A | HQ703321 | BCC294-10 |
|           | ZL080211 | Lingshui, Hainan (LS) | 2008 | Xiaodong Zheng & Qi Li   | 102 | <i>Periglypta puerpera</i>   | <i>Periglypta puerpera</i> A | HQ703322 | BCC295-10 |
|           | ZL080301 | Wenchang, Hainan (WC) | 2008 | Xiaodong Zheng & Qi Li   | 102 | <i>Periglypta puerpera</i>   | <i>Periglypta puerpera</i> A | HQ703323 | BCC296-10 |
|           | ZL080302 | Wenchang, Hainan (WC) | 2008 | Xiaodong Zheng & Qi Li   | 102 | <i>Periglypta puerpera</i>   | <i>Periglypta puerpera</i> A | HQ703324 | BCC297-10 |
|           | ZQ100401 | Qionghai, Hainan (QH) | 2010 | Lingfeng Kong & Jun Chen | 102 | <i>Periglypta puerpera</i>   | <i>Periglypta puerpera</i> A | HQ703325 | BCC298-10 |
|           | ZQ100402 | Qionghai, Hainan (QH) | 2010 | Lingfeng Kong & Jun Chen | 102 | <i>Periglypta puerpera</i>   | <i>Periglypta puerpera</i> A | HQ703326 | BCC299-10 |
|           | ZQ100403 | Qionghai, Hainan (QH) | 2010 | Lingfeng Kong & Jun Chen | 102 | <i>Periglypta puerpera</i>   | <i>Periglypta puerpera</i> A | HQ703327 | BCC300-10 |
|           | ZH100401 | Haikou, Hainan (HK)   | 2010 | Lingfeng Kong & Jun Chen | 102 | <i>Periglypta puerpera</i>   | <i>Periglypta puerpera</i> A | HQ703328 | BCC301-10 |
|           | ZS080221 | Sanya, Hainan (SY)    | 2008 | Xiaodong Zheng & Qi Li   | 82  | <i>Periglypta puerpera</i>   | <i>Periglypta puerpera</i> B | HQ703329 | BCC302-10 |
|           | BB080411 | Beihai, Guangxi (BH)  | 2008 | Lingfeng Kong & Jun Chen | 123 | <i>Periglypta chemnitzii</i> | <i>Periglypta chemnitzii</i> | HQ703330 | BCC303-10 |
|           | BB080412 | Beihai, Guangxi (BH)  | 2008 | Lingfeng Kong & Jun Chen | 123 | <i>Periglypta chemnitzii</i> | <i>Periglypta chemnitzii</i> | HQ703331 | BCC304-10 |
|           | BB080413 | Beihai, Guangxi (BH)  | 2008 | Lingfeng Kong & Jun Chen | 123 | <i>Periglypta chemnitzii</i> | <i>Periglypta chemnitzii</i> | HQ703332 | BCC305-10 |
|           | BB080414 | Beihai, Guangxi (BH)  | 2008 | Lingfeng Kong & Jun Chen | 123 | <i>Periglypta chemnitzii</i> | <i>Periglypta chemnitzii</i> | HQ703333 | BCC306-10 |



|           |                      |      |                          |     |                            |                            |          |           |
|-----------|----------------------|------|--------------------------|-----|----------------------------|----------------------------|----------|-----------|
| DS080201  | Sanya, Hainan (SY)   | 2008 | Xiaodong Zheng & Qi Li   | 2   | <i>Antigona lamellaris</i> | <i>Antigona lamellaris</i> | HQ703334 | BCC307-10 |
| DS080202  | Sanya, Hainan (SY)   | 2008 | Xiaodong Zheng & Qi Li   | 2   | <i>Antigona lamellaris</i> | <i>Antigona lamellaris</i> | HQ703335 | BCC308-10 |
| DS080203  | Sanya, Hainan (SY)   | 2008 | Xiaodong Zheng & Qi Li   | 2   | <i>Antigona lamellaris</i> | <i>Antigona lamellaris</i> | HQ703336 | BCC309-10 |
| DB080411  | Beihai, Guangxi (BH) | 2008 | Lingfeng Kong & Jun Chen | 2   | <i>Antigona lamellaris</i> | <i>Antigona lamellaris</i> | HQ703337 | BCC310-10 |
| DB080412  | Beihai, Guangxi (BH) | 2008 | Lingfeng Kong & Jun Chen | 2   | <i>Antigona lamellaris</i> | <i>Antigona lamellaris</i> | HQ703338 | BCC311-10 |
| DB080413  | Beihai, Guangxi (BH) | 2008 | Lingfeng Kong & Jun Chen | 2   | <i>Antigona lamellaris</i> | <i>Antigona lamellaris</i> | HQ703339 | BCC312-10 |
| DB080414  | Beihai, Guangxi (BH) | 2008 | Lingfeng Kong & Jun Chen | 2   | <i>Antigona lamellaris</i> | <i>Antigona lamellaris</i> | HQ703340 | BCC313-10 |
| DB080415* | Beihai, Guangxi (BH) | 2008 | Lingfeng Kong & Jun Chen | 2   | <i>Antigona lamellaris</i> | <i>Antigona lamellaris</i> | HQ703341 | BCC314-10 |
| DL080301  | Lingao, Hainan (LG)  | 2008 | Xiaodong Zheng & Qi Li   | 107 | <i>Globivenus toreuma</i>  | <i>Globivenus toreuma</i>  | HQ703342 | BCC315-10 |

§: cut-off value is 4%

\*: juvenile specimen

#: first record from China or new to science

N/A: not applicable

—: unable to match any records in BOLD database

※: individual of *Paphia schnelliana* Zhuang (2001) (non Dunker, 1862)
