# Supplementary material for: How DNA Barcodes Complement Taxonomy and Explore Species Diversity: The Case Study of a Poorly Understood Marine Fauna
Source: PubMed Central journal article supplement (PMC3116896; doi:10.1371/journal.pone.0021326), 2011-06-16
Supplement: pone.0021326.s003.pdf [file pone.0021326.s003.pdf]

33 Mercenaria mercenaria|EU360373  
17 Mercenaria mercenaria|EU360380  
17 Mercenaria mercenaria|EU360420  
9 Mercenaria mercenaria|EU360379  
15 Mercenaria mercenaria|EU360375  
8 Mercenaria mercenaria|EU360415  
14 Mercenaria mercenaria|EU360378  
79 Mercenaria mercenaria|EU360434  
Mercenaria mercenaria|EU360398  
Mercenaria mercenaria|HQ703076  
Mercenaria mercenaria|HQ703074  
Mercenaria mercenaria|EU360429  
67 Mercenaria mercenaria|EU360430  
Mercenaria mercenaria|EU360386  
Mercenaria mercenaria|EU360418  
Mercenaria mercenaria|EU360396  
Mercenaria mercenaria|EU360407  
Mercenaria mercenaria|EU360399  
Mercenaria mercenaria|EU360426  
0 Mercenaria mercenaria|EU360361  
Mercenaria mercenaria|EU360421  
Mercenaria mercenaria|EU360354  
Mercenaria mercenaria|EU360385  
Mercenaria mercenaria|EU360432  
Mercenaria mercenaria|EU360388  
60 Mercenaria mercenaria|EU360433  
Mercenaria mercenaria|EU360409  
42 Mercenaria mercenaria|EU360405  
30 Mercenaria mercenaria|EU360431  
Mercenaria mercenaria|EU360368  
55 Mercenaria mercenaria|EU360406  
Mercenaria mercenaria|EU360428  
12 Mercenaria mercenaria|EU360411  
12 Mercenaria mercenaria|EU360387  
42 Mercenaria mercenaria|EU360363  
58 Mercenaria mercenaria|EU360358  
30 Mercenaria mercenaria|EU360416  
Mercenaria mercenaria|EU360391  
Mercenaria mercenaria|EU360425  
25 Mercenaria mercenaria|HQ703073  
43 Mercenaria mercenaria|AF008299  
27 Mercenaria mercenaria|DQ399403  
95 Mercenaria mercenaria|U47648  
96 Mercenaria mercenaria|EU360389  
47 Mercenaria mercenaria|EU360401  
0 Mercenaria mercenaria|EU360382  
50 Mercenaria mercenaria|DQ184836  
Mercenaria mercenaria|EU360404  
Mercenaria mercenaria|EU360366  
Mercenaria mercenaria|EU360355  
77 Mercenaria mercenaria|EU360397  
38 Mercenaria mercenaria|EU360377  
7 Mercenaria mercenaria|EU360374  
Mercenaria mercenaria|EU360414  
Mercenaria mercenaria|EU360395  
Mercenaria mercenaria|EU360413  
Mercenaria mercenaria|EU360365  
25 Mercenaria mercenaria|EU360437  
6 Mercenaria mercenaria|EU360410  
50 Mercenaria mercenaria|EU360384  
Mercenaria mercenaria|EU360393  
10 Mercenaria mercenaria|EU360372  
7 Mercenaria mercenaria|EU360392  
51 Mercenaria mercenaria|EU360417  
73 Mercenaria mercenaria|EU360408  
13 Mercenaria mercenaria|EU360403  
8 Mercenaria mercenaria|EU360436  
Mercenaria mercenaria|EU360390  
Mercenaria mercenaria|EU360394  
38 Mercenaria mercenaria|EU360419  
60 Mercenaria mercenaria|EU360369  
Mercenaria mercenaria|EU360381  
Mercenaria mercenaria|EU360370  
21 Mercenaria mercenaria|EU360427  
Mercenaria mercenaria|EU360438  
24 Mercenaria mercenaria|HQ703072  
Mercenaria mercenaria|HQ703071  
39 Mercenaria mercenaria|HQ703075  
100 Mercenaria mercenaria|EU360357  
Mercenaria mercenaria|EU360362  
Mercenaria mercenaria|EU360412  
Mercenaria mercenaria|EU360400  
23 Mercenaria mercenaria|EU360424  
53 Mercenaria mercenaria|EU360364  
36 Mercenaria mercenaria|EU360360  
Mercenaria mercenaria|EU360402

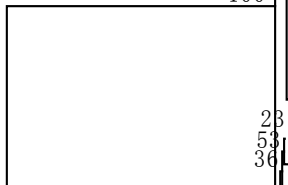

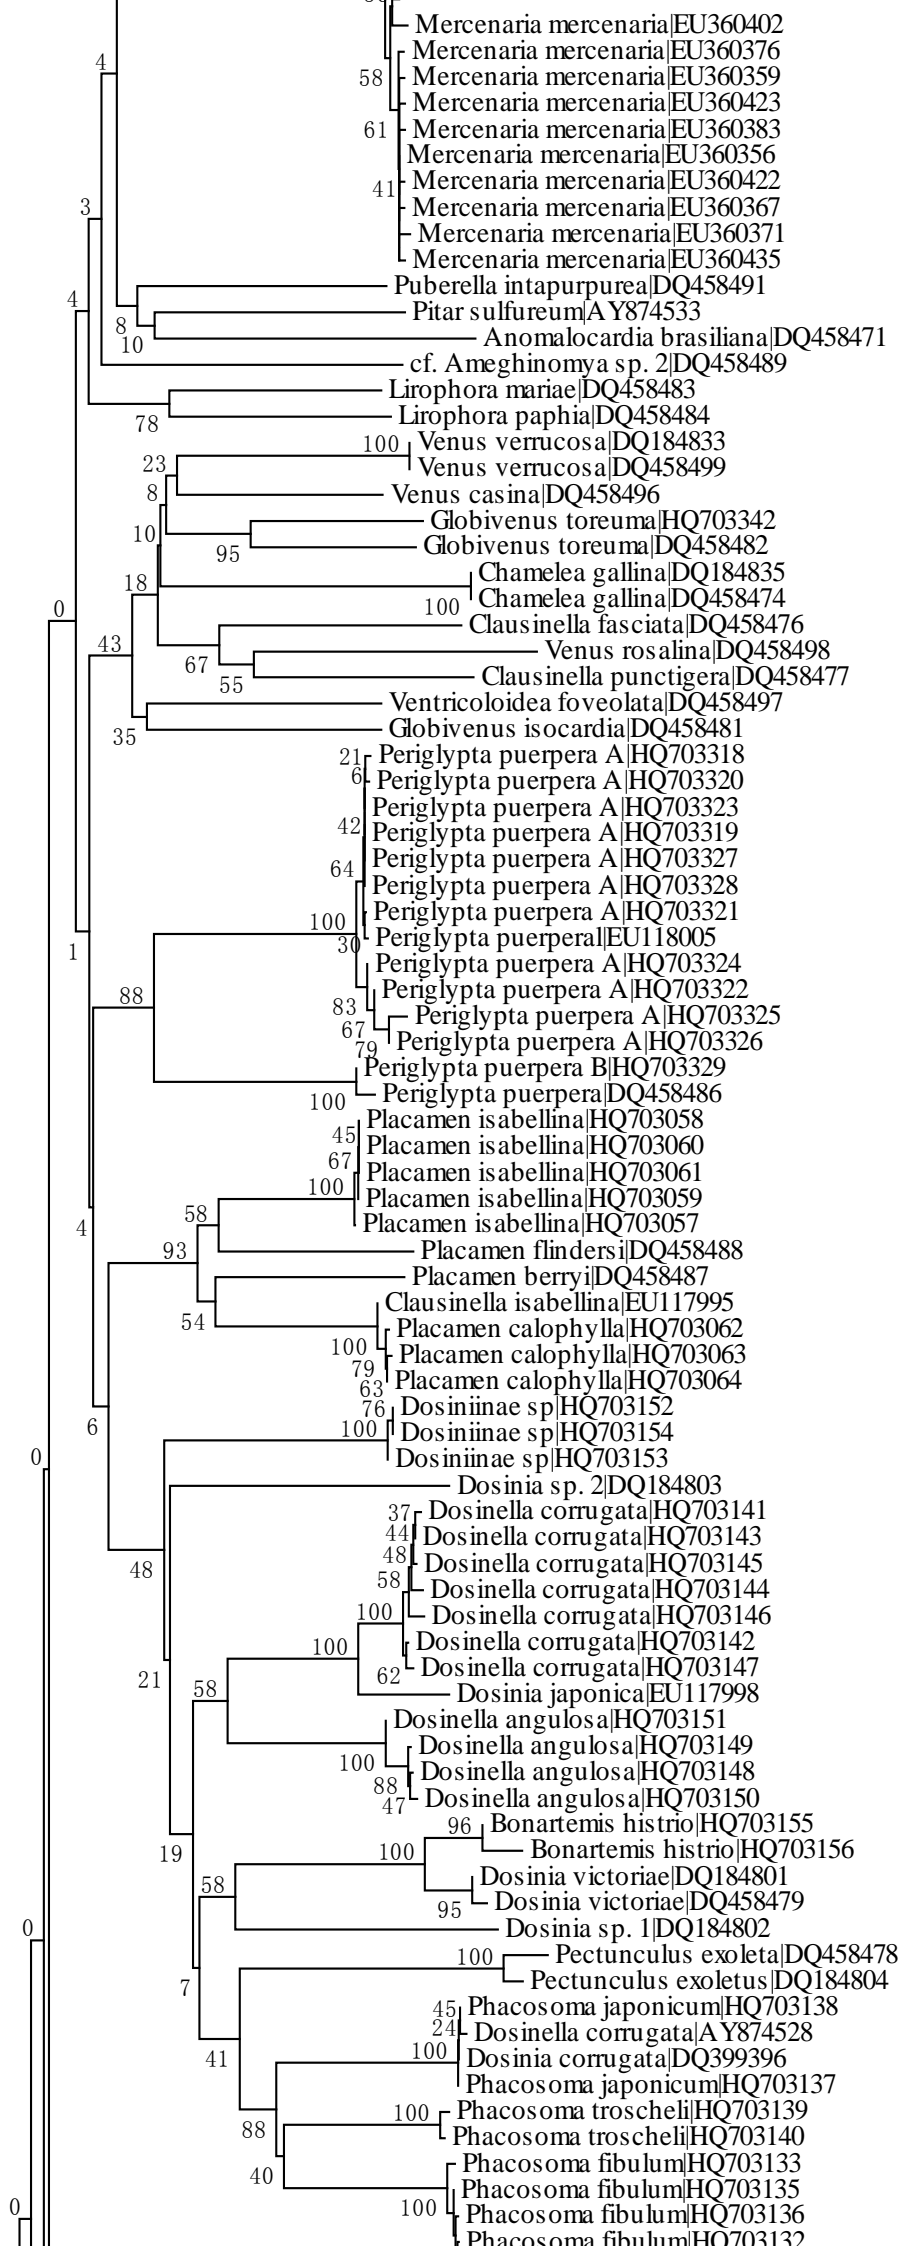

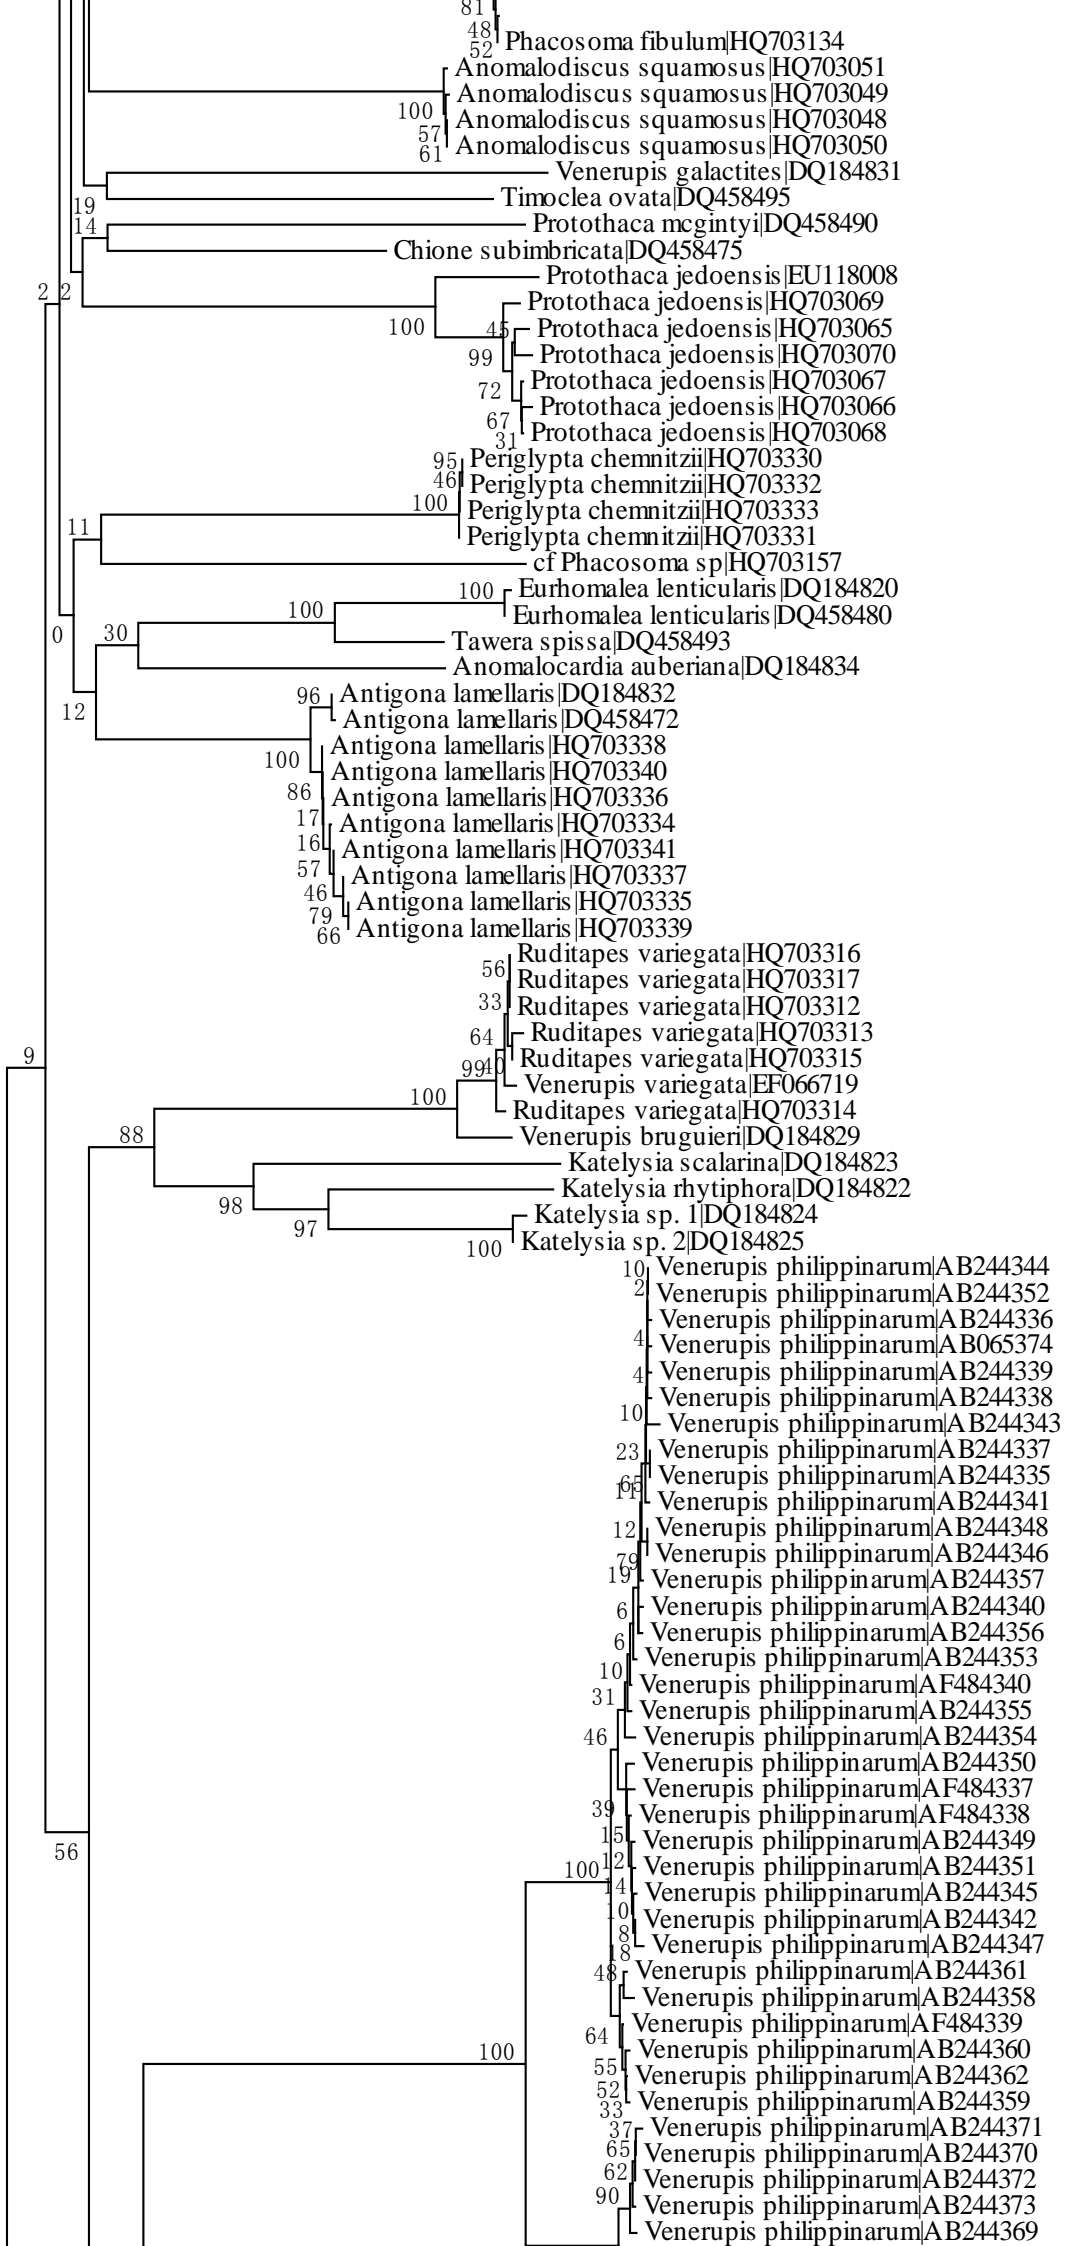

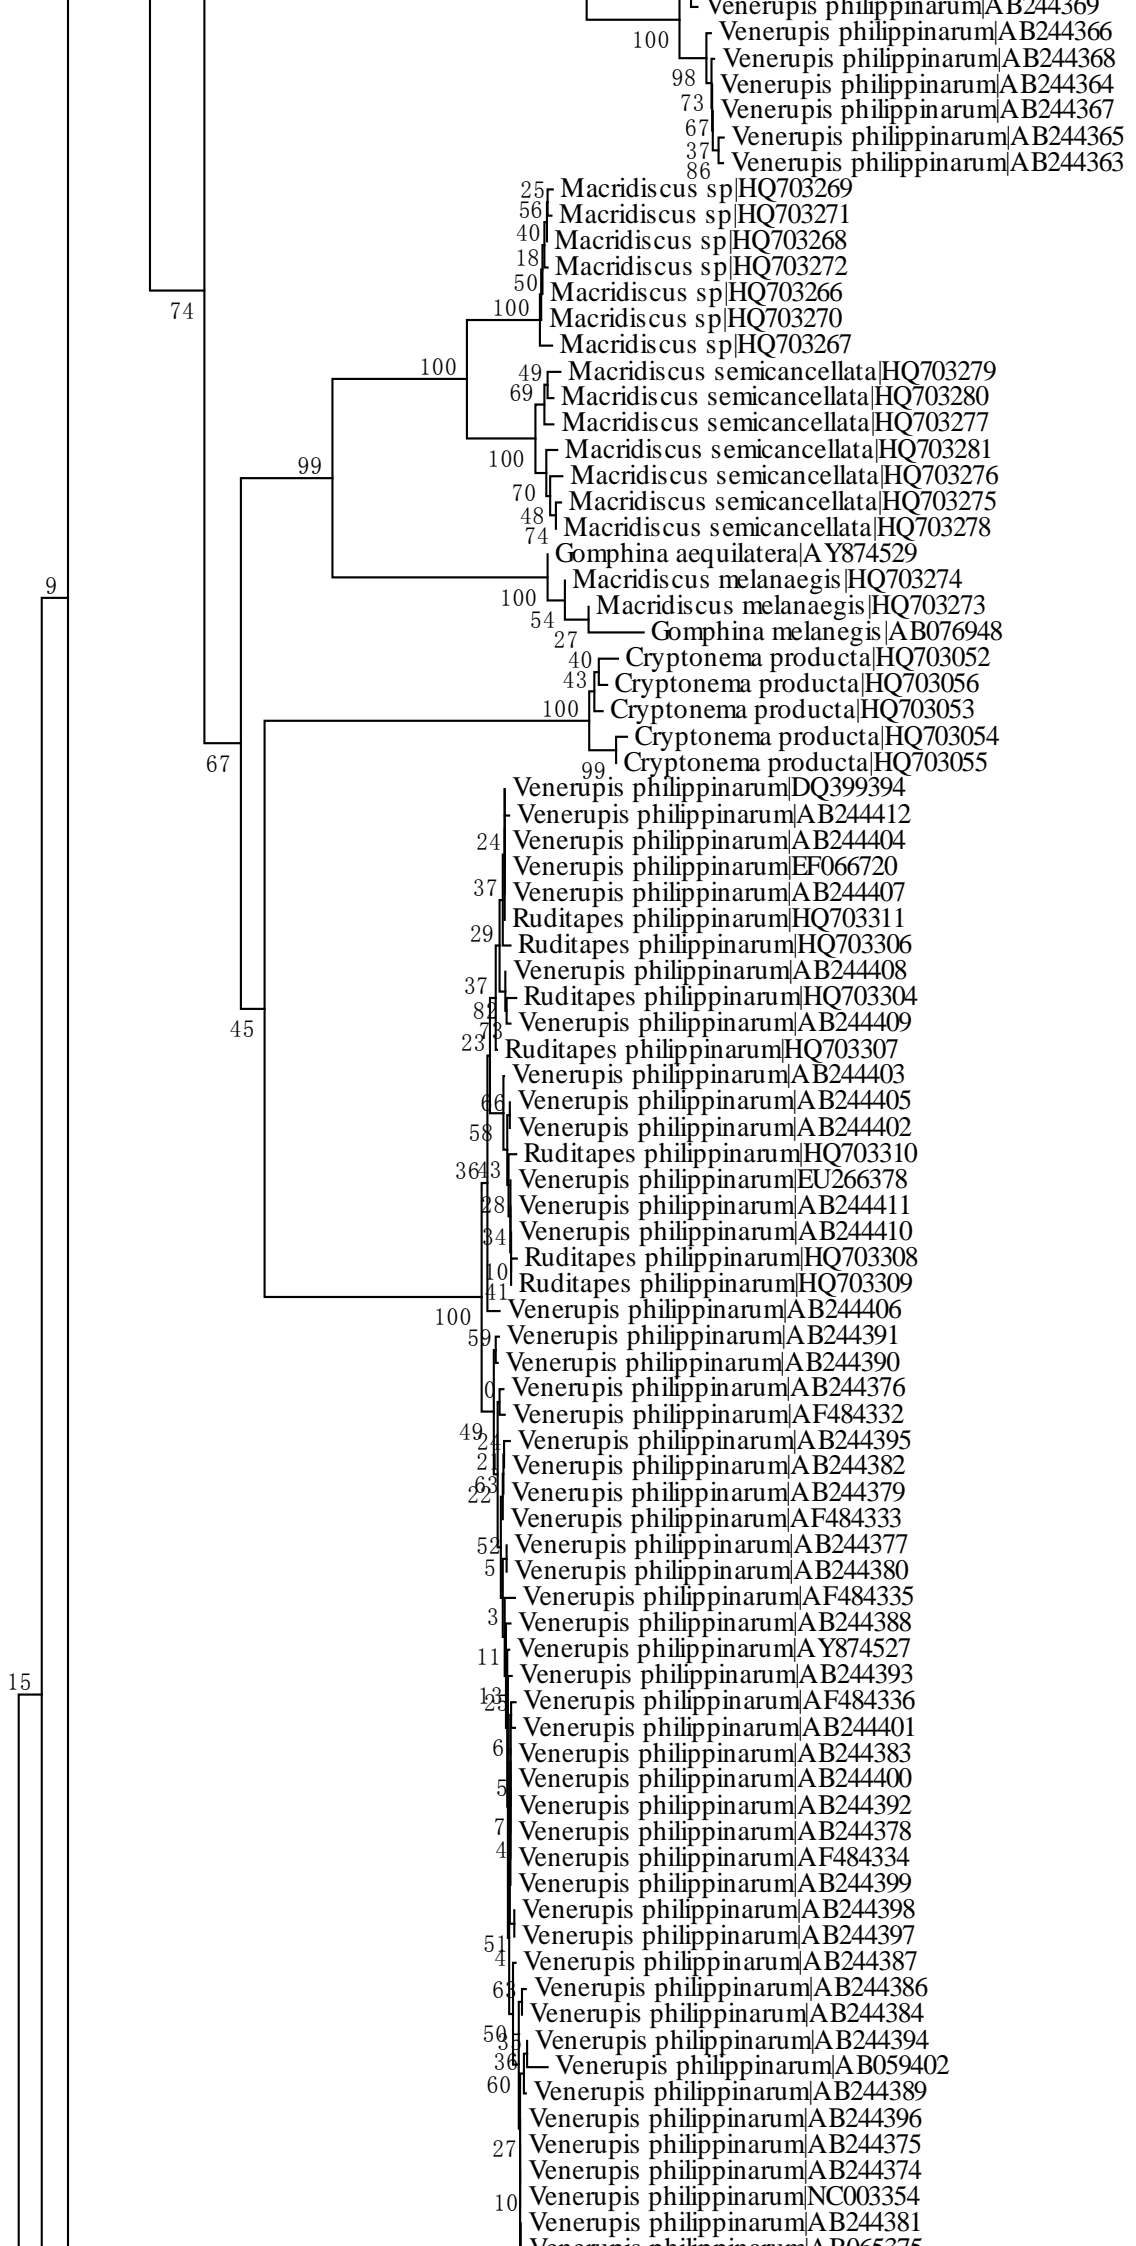

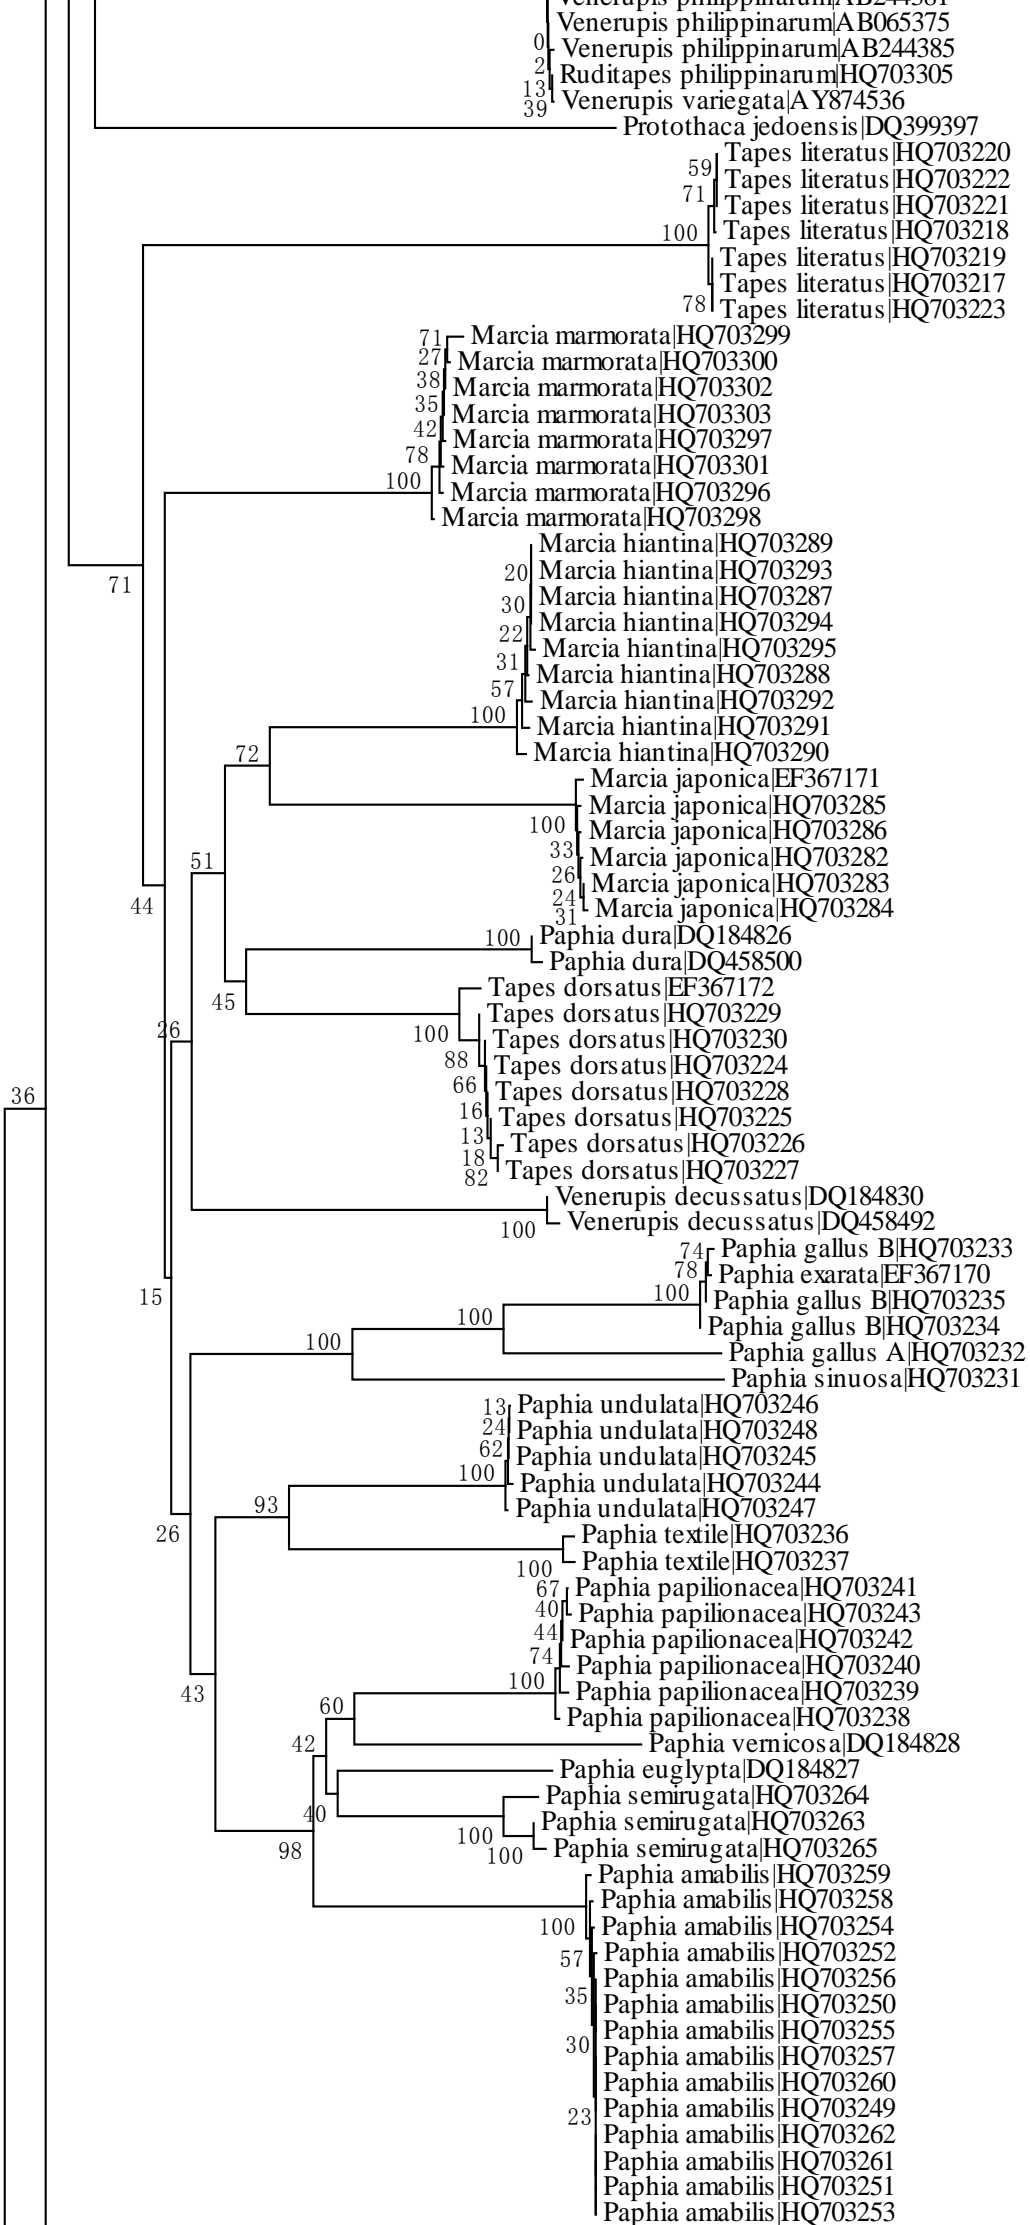

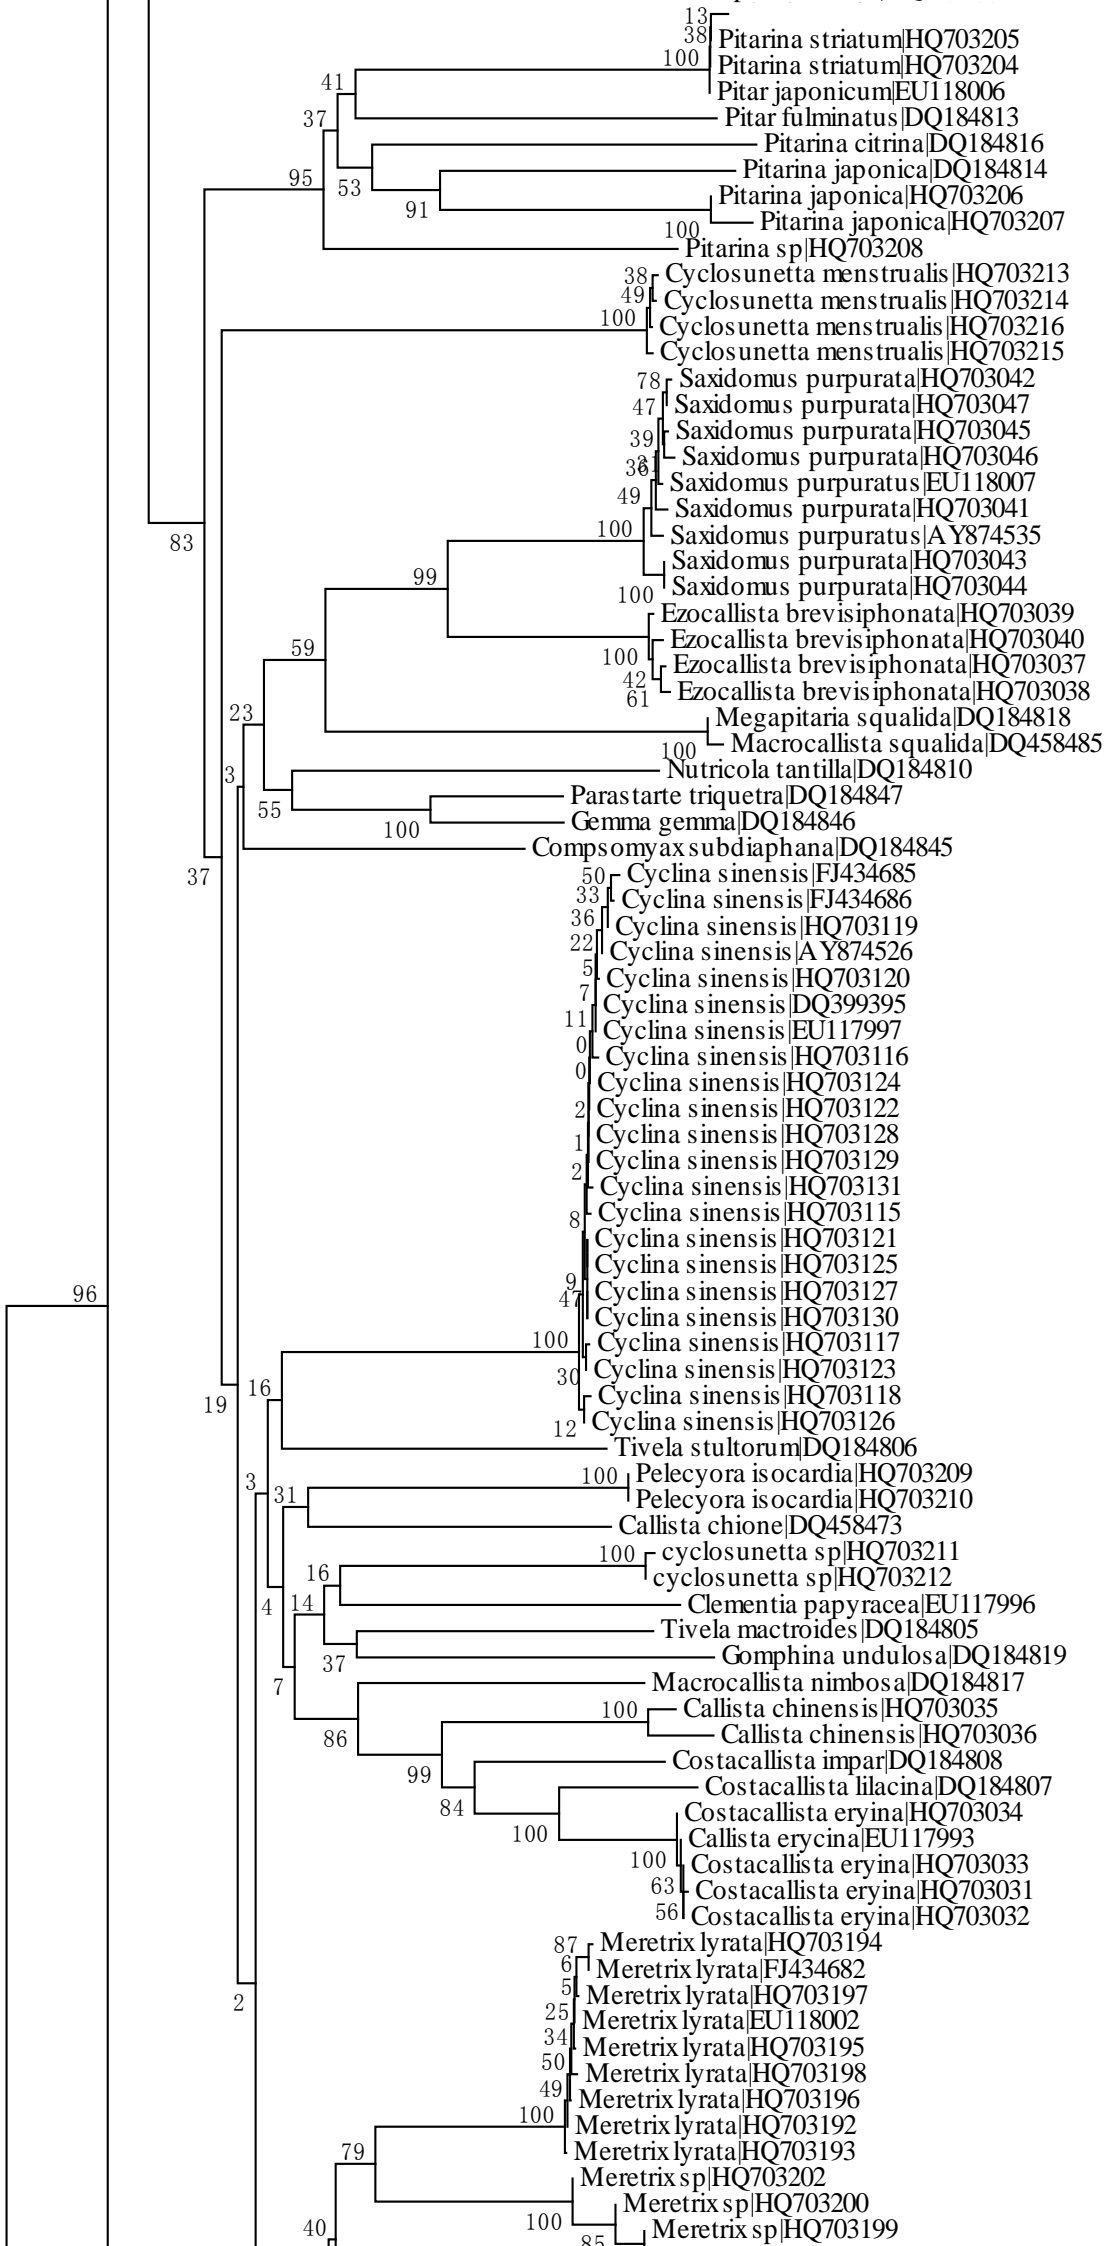

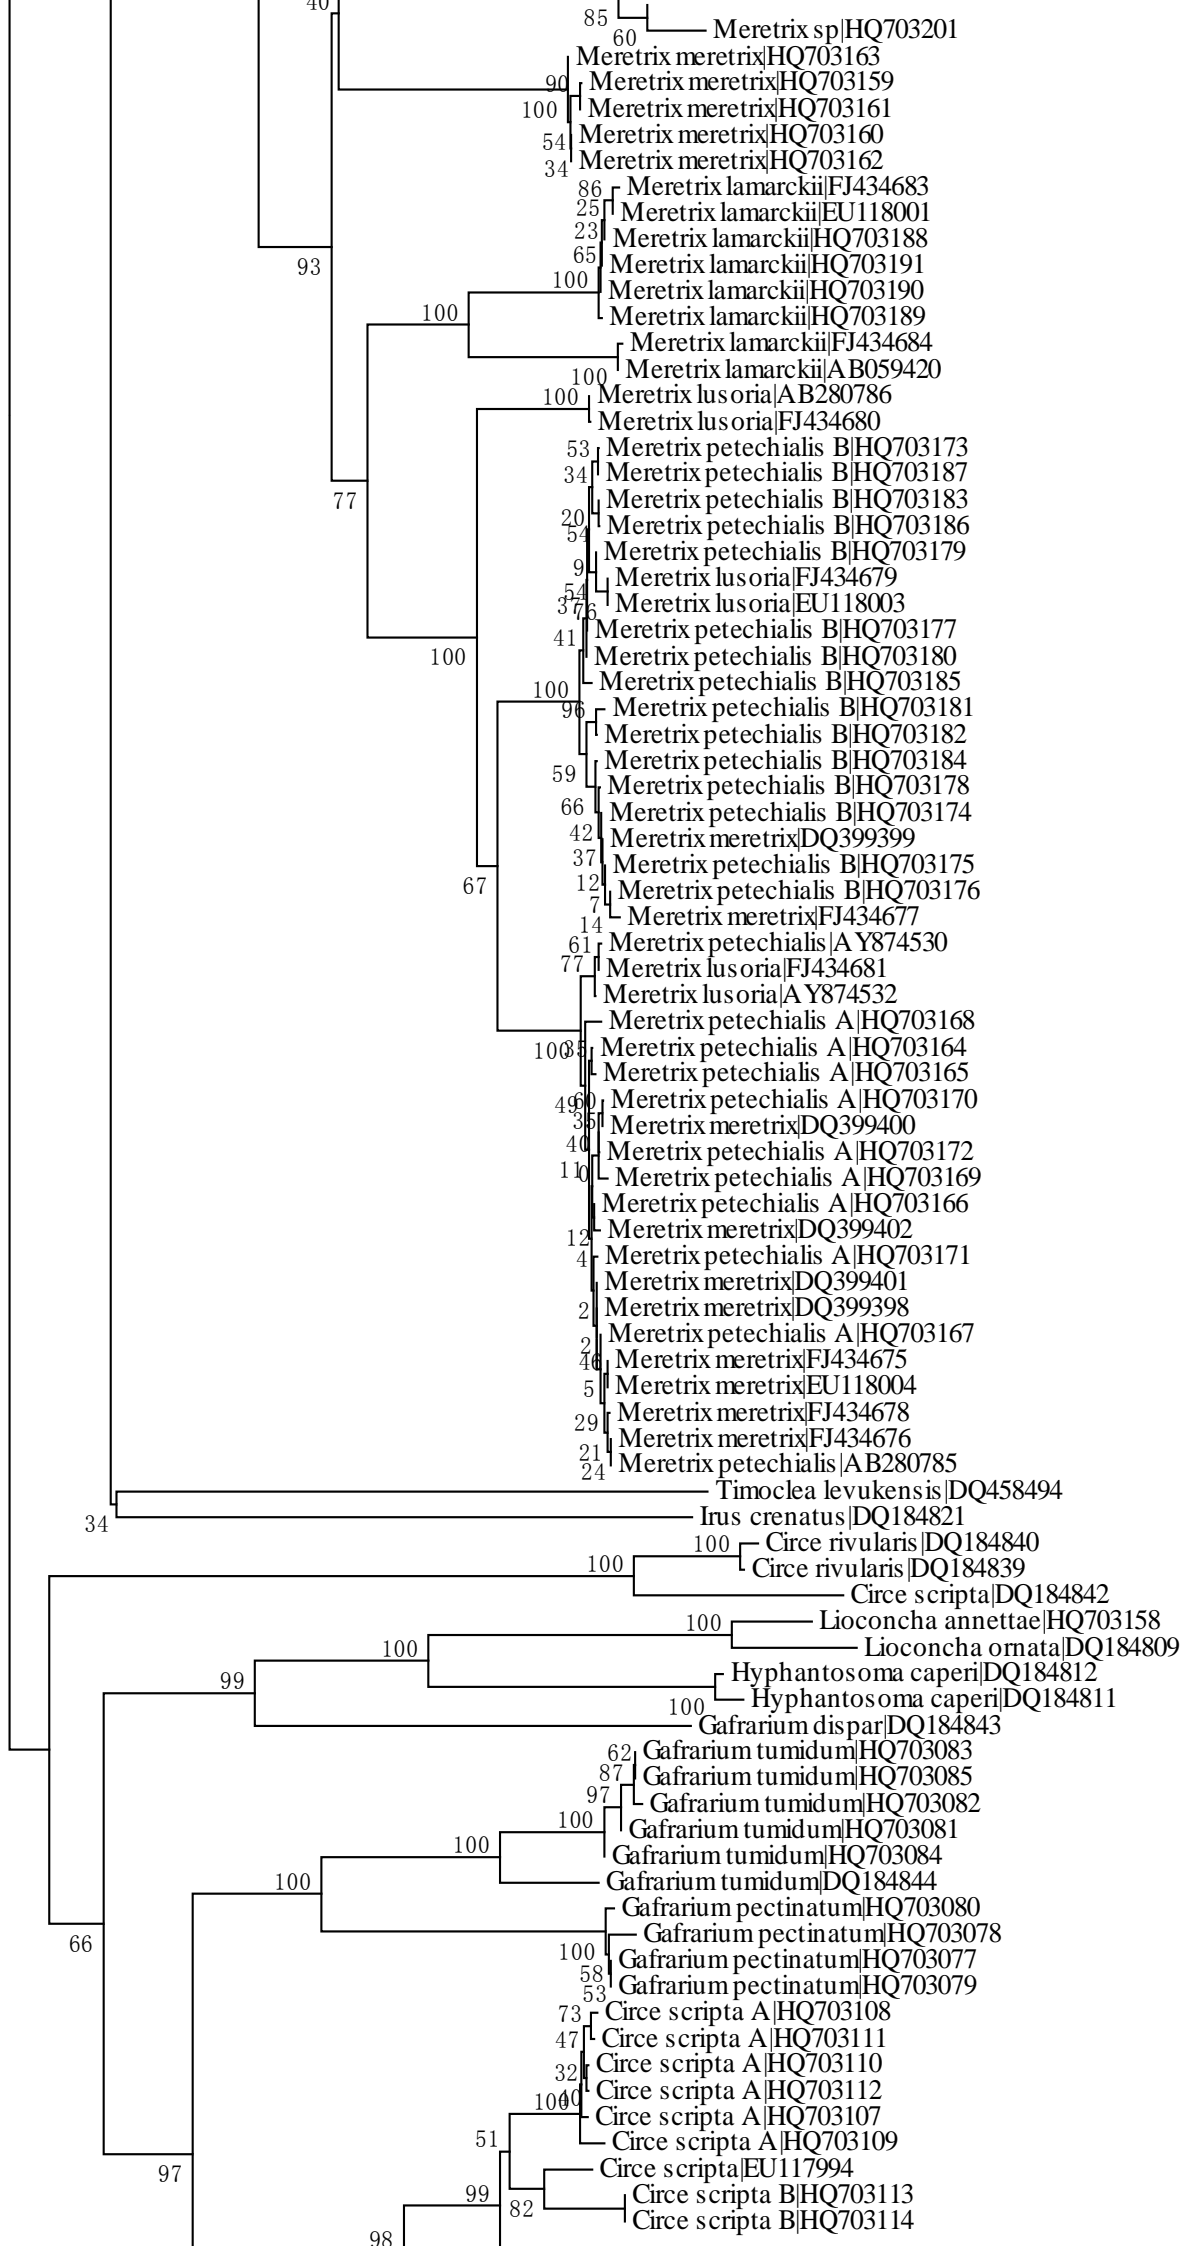

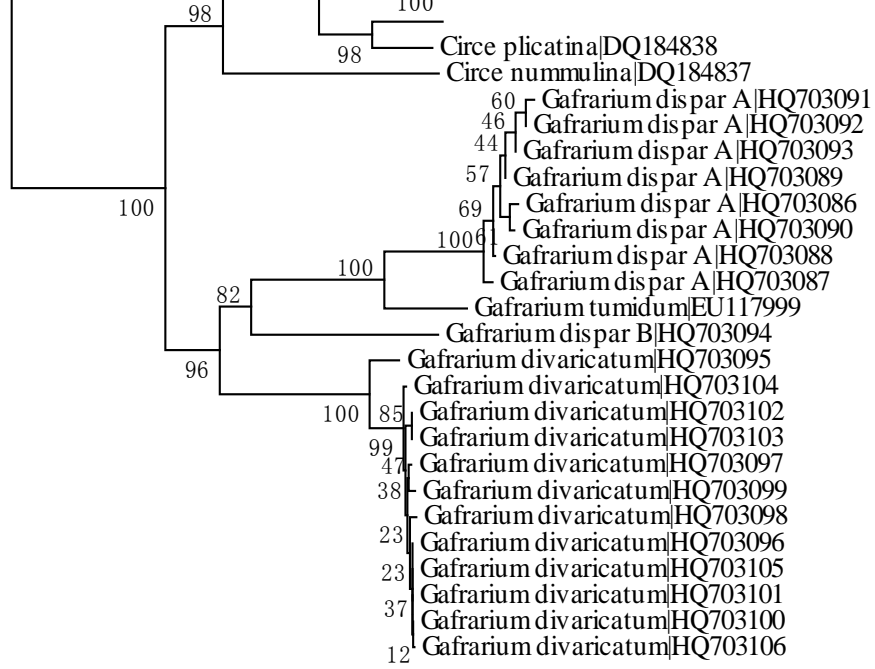

0.05
